# Supplementary material for: In Search of Effective Anticancer Agents—Novel Sugar Esters Based on Polyhydroxyalkanoate Monomers
Source: MDPI journal article supplement (doi:10.3390/ijms22137238), 2021-07-05
Supplement: s1 [file s1]

# In search for effective anticancer agents – novel sugar esters based on polyhydroxyalkanoate monomers

Wojciech Snoch<sup>1</sup>, Dawid Wnuk<sup>2</sup>, Tomasz Witko<sup>1</sup>, Jakub Staroń<sup>3</sup>, Andrzej J. Bojarski<sup>3</sup>, Ewelina Jarek<sup>1</sup>, Francisco J. Plou<sup>4</sup>, Maciej Guzik<sup>1</sup>

<sup>1</sup> Jerzy Haber Institute of Catalysis and Surface Chemistry, Polish Academy of Sciences, Niezapominajek 8, 30-239 Kraków, Poland

<sup>2</sup> Department of Cell Biology, Faculty of Biochemistry, Biophysics and Biotechnology, Jagiellonian University, Gronostajowa 7, 30-387 Kraków, Poland

<sup>3</sup> Institute of Pharmacology, Polish Academy of Sciences, Smętna 12, 31-343 Kraków, Poland

<sup>4</sup> Instituto de Catalisis y Petroleoquimica, CSIC (Spanish National Research Council), Calle de Marie Curie, 2, 28049 Madrid, Spain

\* Correspondence: maciej.guzik@ikifp.edu.pl; Tel.: +48 12 6395 159

## SUPPLEMENTARY

### Index of figures and tables:

- Fig 1. List of compound names, shortcuts and structures generated in ChemSketch
- Table 1. Precursor and product ions of sugar esters obtained in MRM LC-MS QQQ analysis:
- Fig 2. IR spectrum of C12- (sucrose monolaurate) as a referring compound
- Fig 3. IR spectra of methyl esters of not modified PHN monomers (mixture of 3-(*R*)-hydroxynonanoic and 3-(*R*)-hydroxyheptanoic acids)
- Fig 4. Spectra analysis of methyl esters of methyl esters of 3-(*R*)- (2'-2''- trlifuoroethyl)-nonanoic and heptanoic acids (fluorinated PHN monomers or mPHN-F)
- Fig 5. Spectral analysis of glucose nonanoate (C9-glu)
- Fig 6. Spectral analysis galactose nonanoate (C9-gal)
- Fig 7. IR spectra of lactose nonanoate (C9-lac)
- Fig 8. Spectral analysis of glucose mono and diesters esters originated from mixture of not modified PHN monomers (mPHN-glu)
- Fig 9. Spectral analysis of galactose mono and diesters esters originated from mixture of not modified PHN monomers (mPHN-gal)
- Fig 10. Spectral analysis of lactose mono and diesters esters originated from mixture of not modified PHN monomers (mPHN-lac)
- Fig 11. IR spectra of glucose mono and diesters esters originated from mixture of fluorinated PHN monomers (F-mPHN-glu)
- Fig 12. IR spectra of galactose mono and diesters esters originated from mixture of fluorinated PHN monomers (F-mPHN-gal)
- Table 2. Cytotoxicity of SFAE determined by MTT assay

- Fig 13. IR spectra of lactose mono and diesters esters originated from mixture of fluorinated PHN monomers (F-mPHN-lac)
- Fig 14. IR spectra of fluorinated esters set together

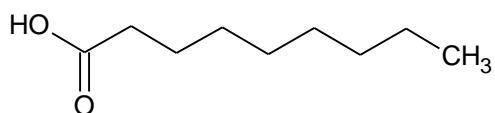

a) **C9**: nonanoic acid

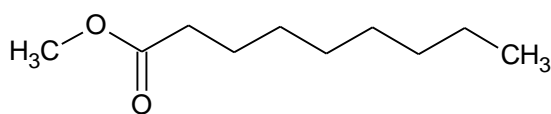

b) **C9-Me**: nonanoic methyl ester

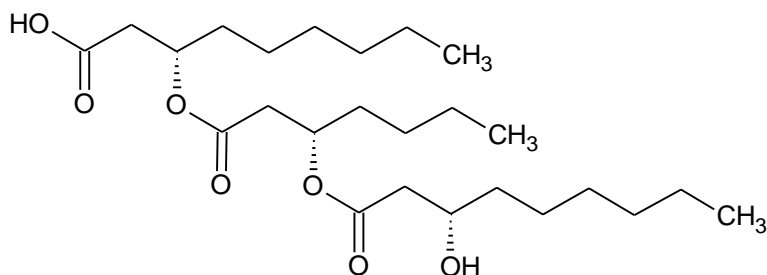

c) **PHN**: poly -(3*R*)-hydroxynonanoate- co- (3*R*)-hydroxyheptanoate

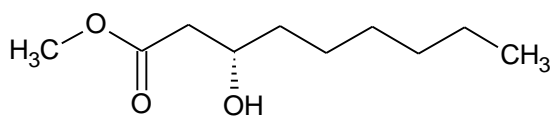

d) **R3OH-C9-Me**: mixture of (3*R*)-hydroxynonanoate methyl esters

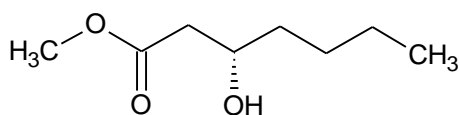

e) **R3OH-C7-Me**: mixture of (3*R*)-hydroxyheptanoate methyl esters

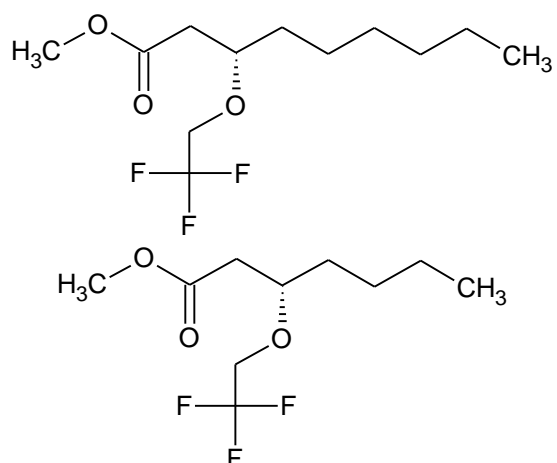

- f) **F-mPHN-Me**: mixture of fluorinated PHN monomers: (3*R*)-3-(2,2,2-trifluoroethoxy)nonanoate methyl esters and (3*R*)-3-(2,2,2-trifluoroethoxy)heptanoate methyl esters

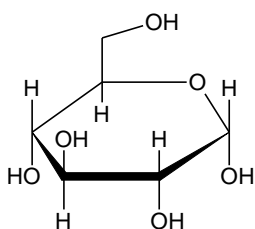

- g) **glu**:  $\alpha$ -D-glucopyranose

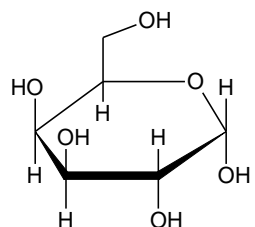

- h) **gal**:  $\beta$ -D-galactopyranose

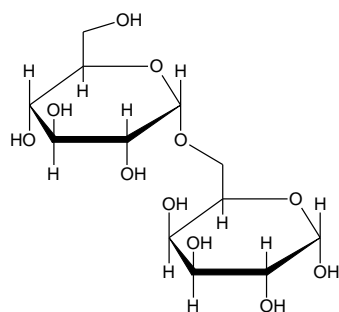

- i) **lac**:  $\beta$ -D-Galactopyranosyl-(1 $\rightarrow$ 4)-D-glucopyranose

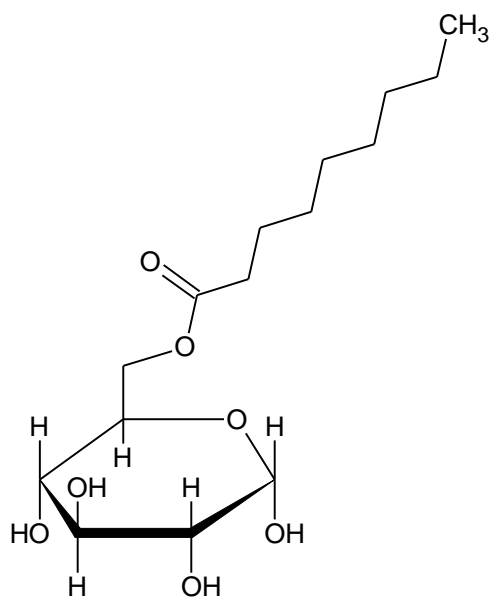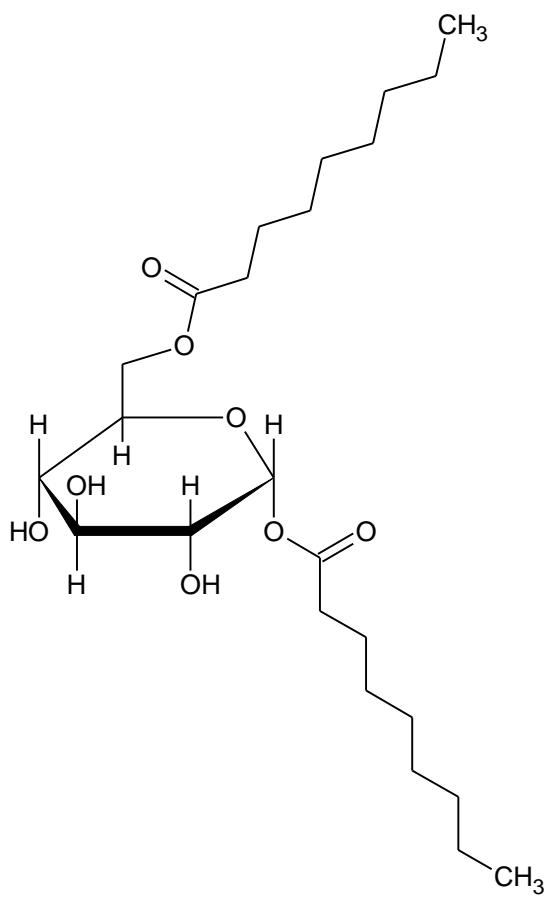

j) **C9-glu:** mixture of glucose nonanoic mono and diesters

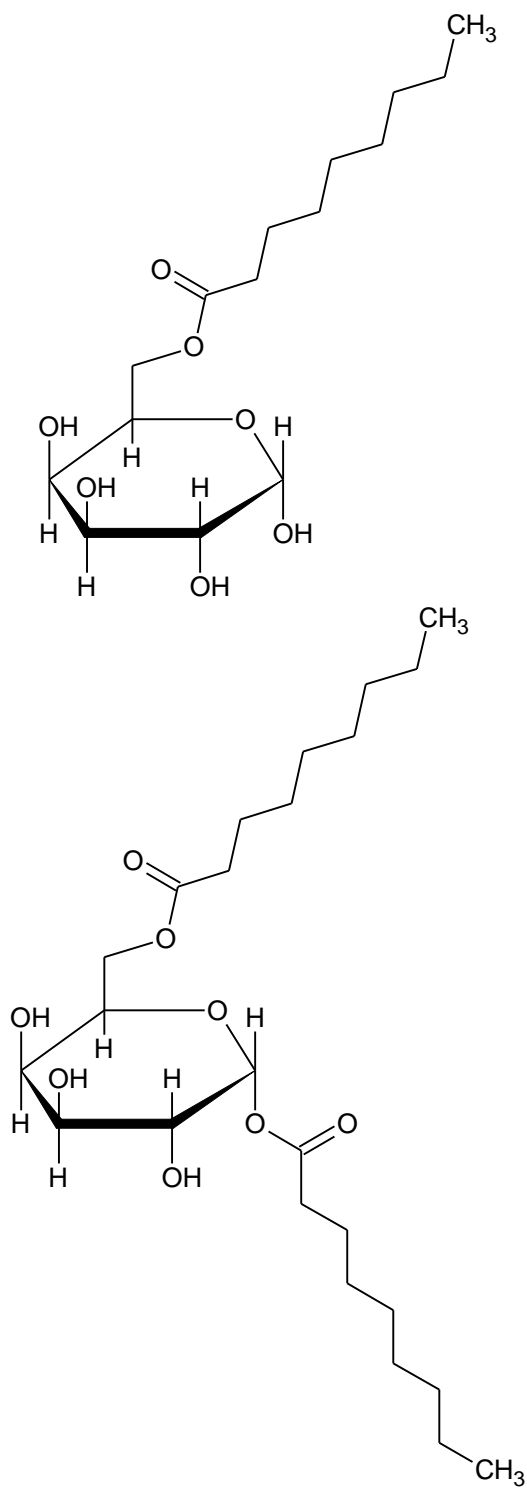

k) **C9-gal**: mixture of galactose nonanoic mono and diesters

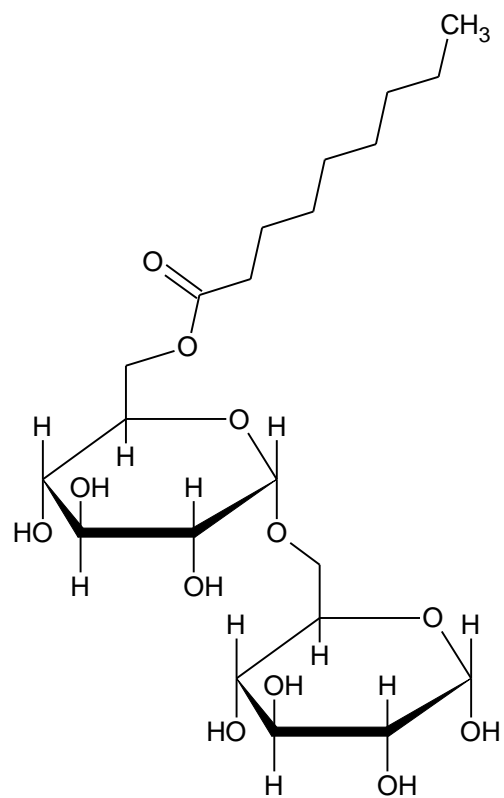

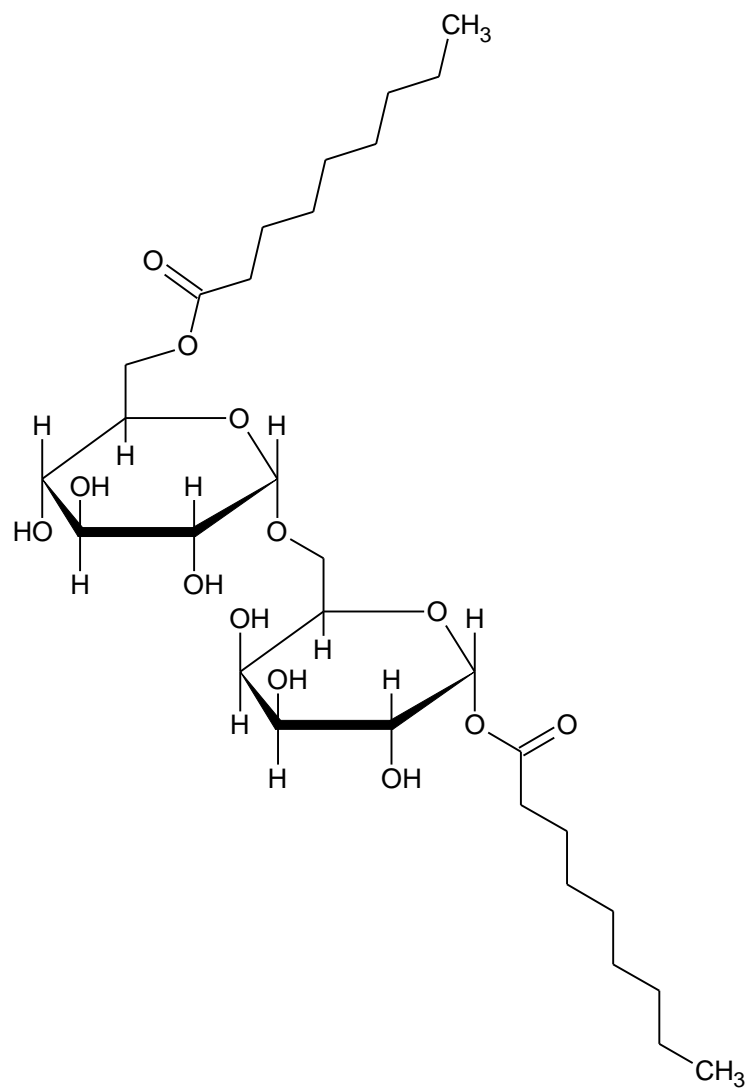

1) **C9-lac:** mixture of lactose nonanoic mono and diesters

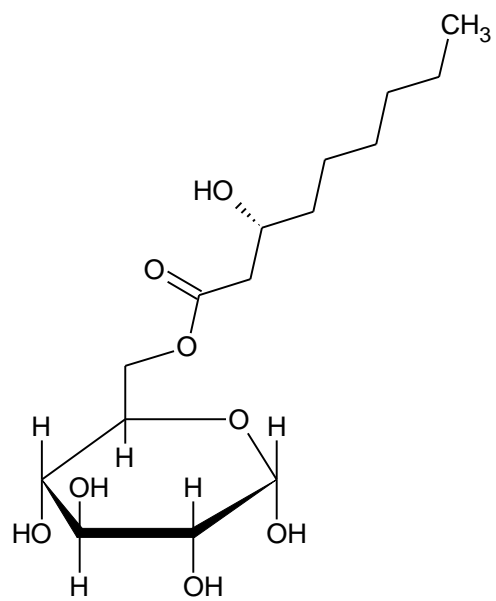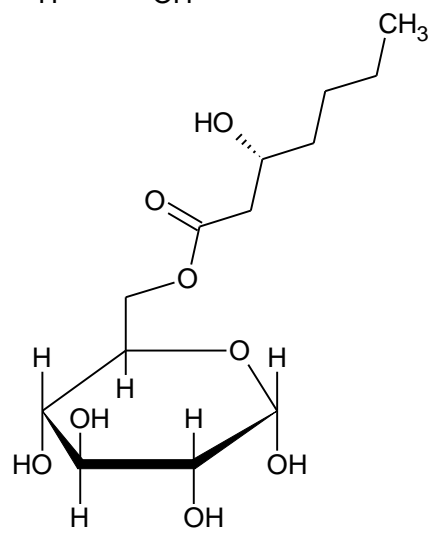



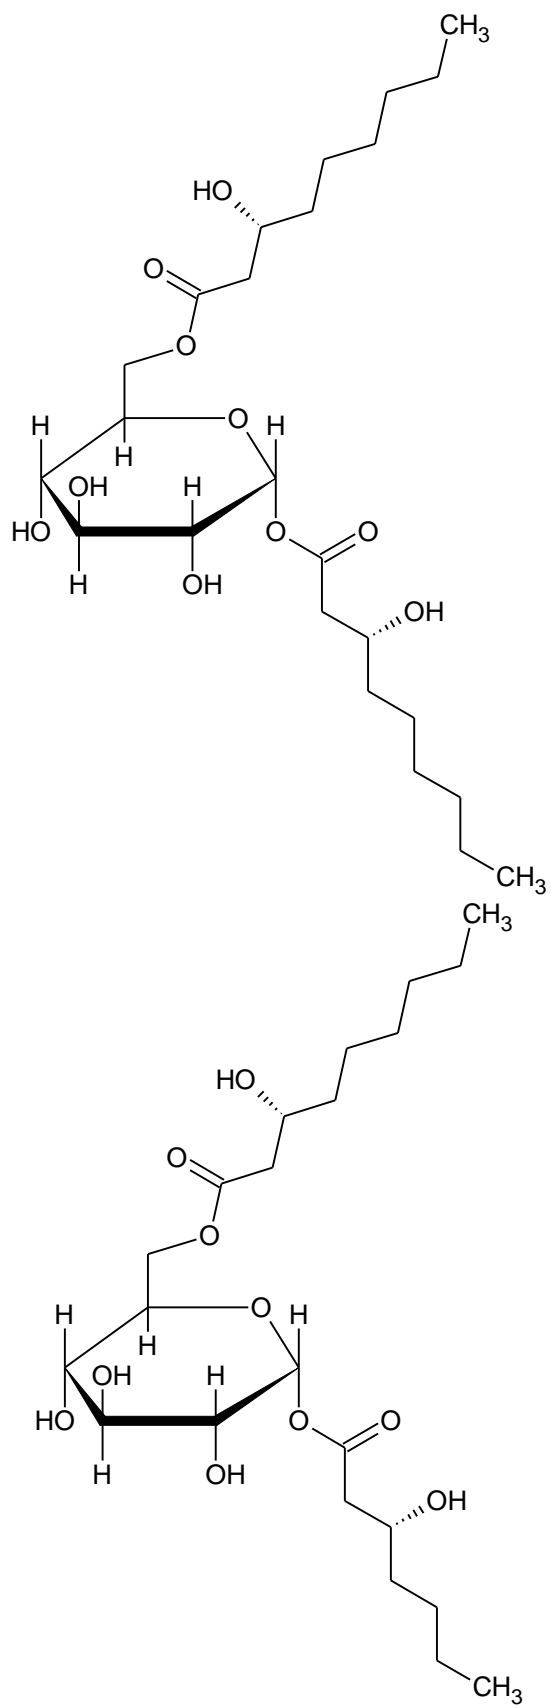

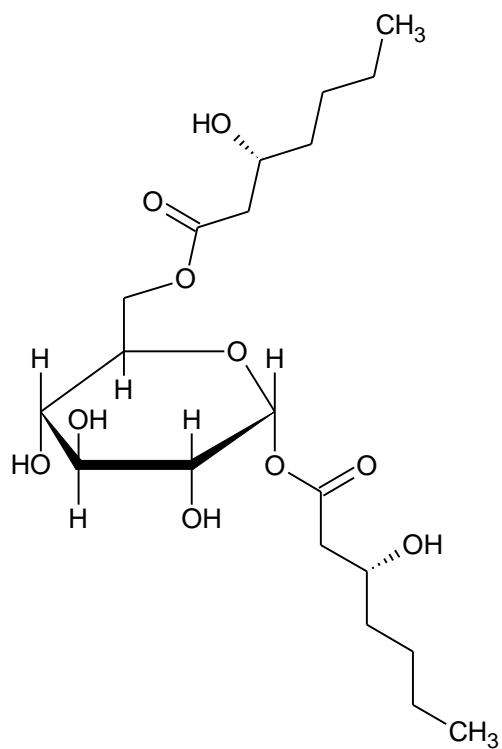

m) **mPHN-glu**: mixture of (3*R*)-hydroxynonanoate glucose esters and (3*R*)-hydroxyheptanoate glucose mono and diesters

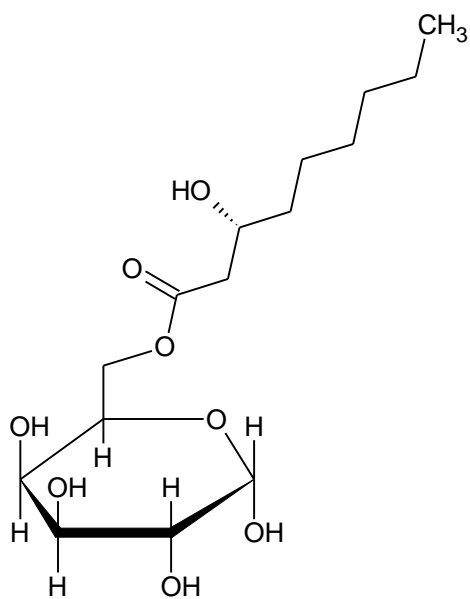

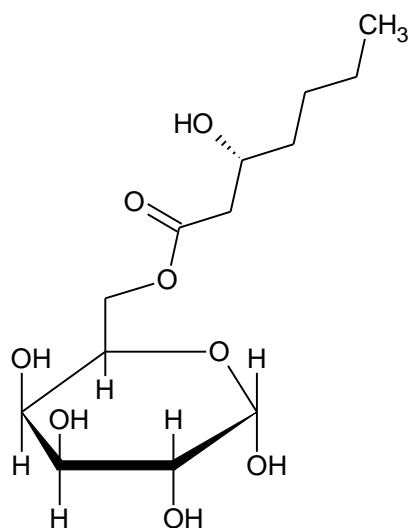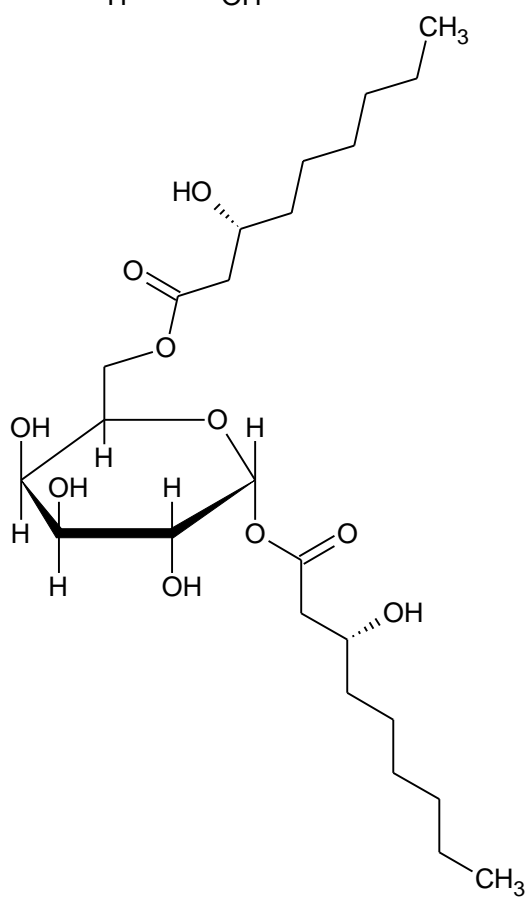

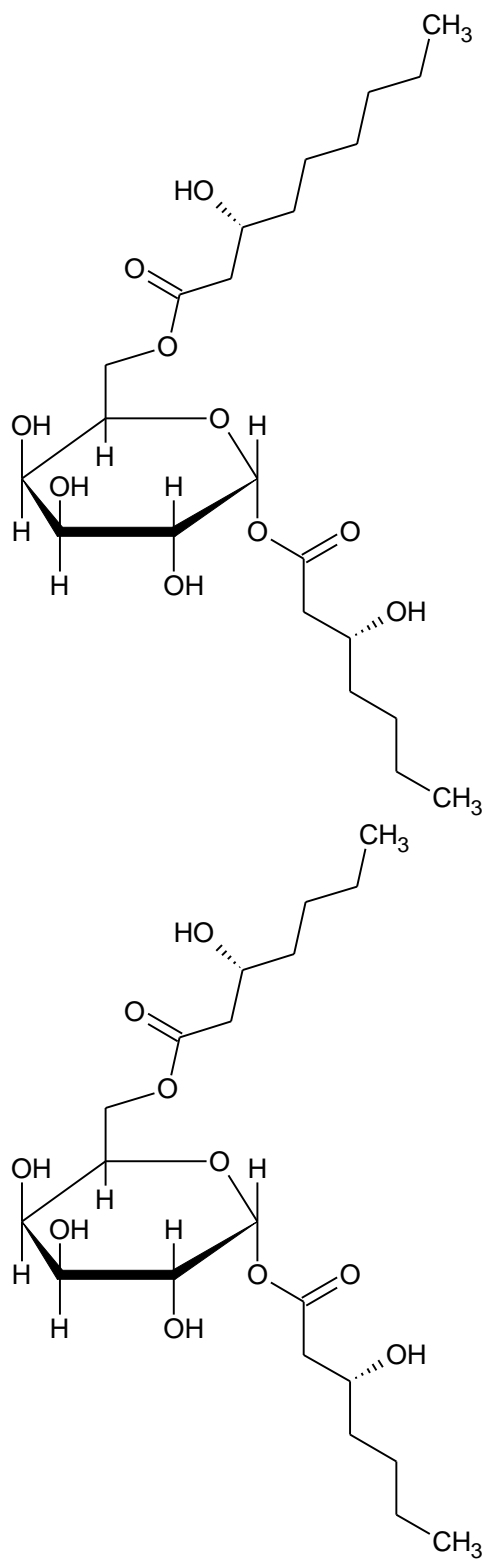

- n) **mPHN-gal**: mixture of (3*R*)-hydroxynonanoate galactose esters and (3*R*)-hydroxyheptanoate galactose mono and diesters

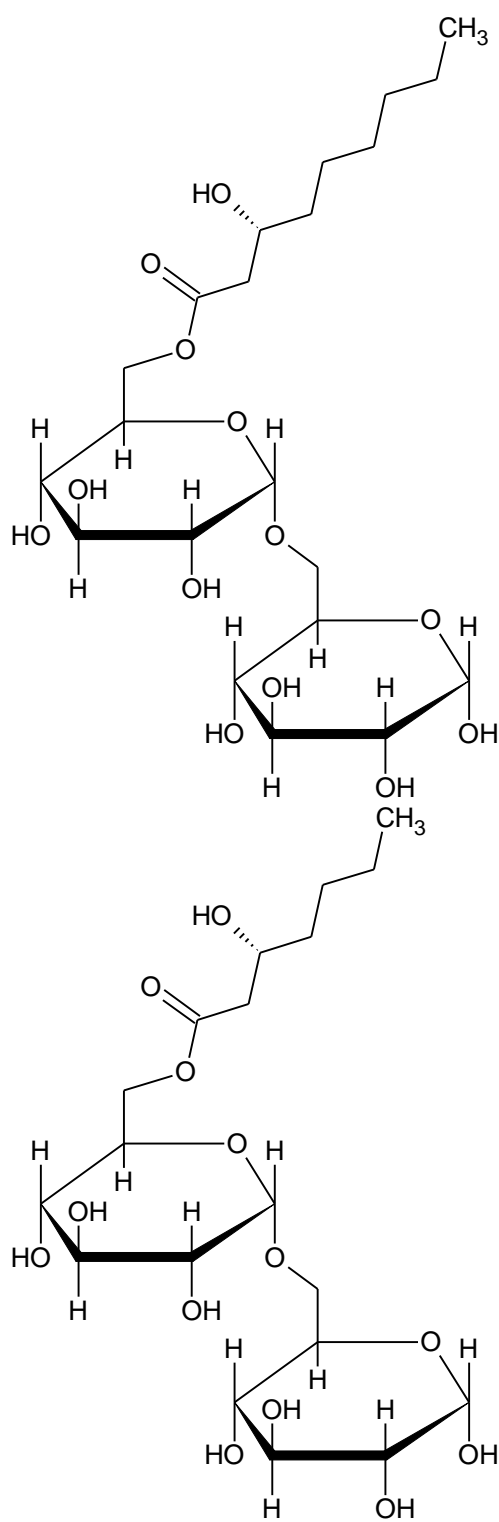

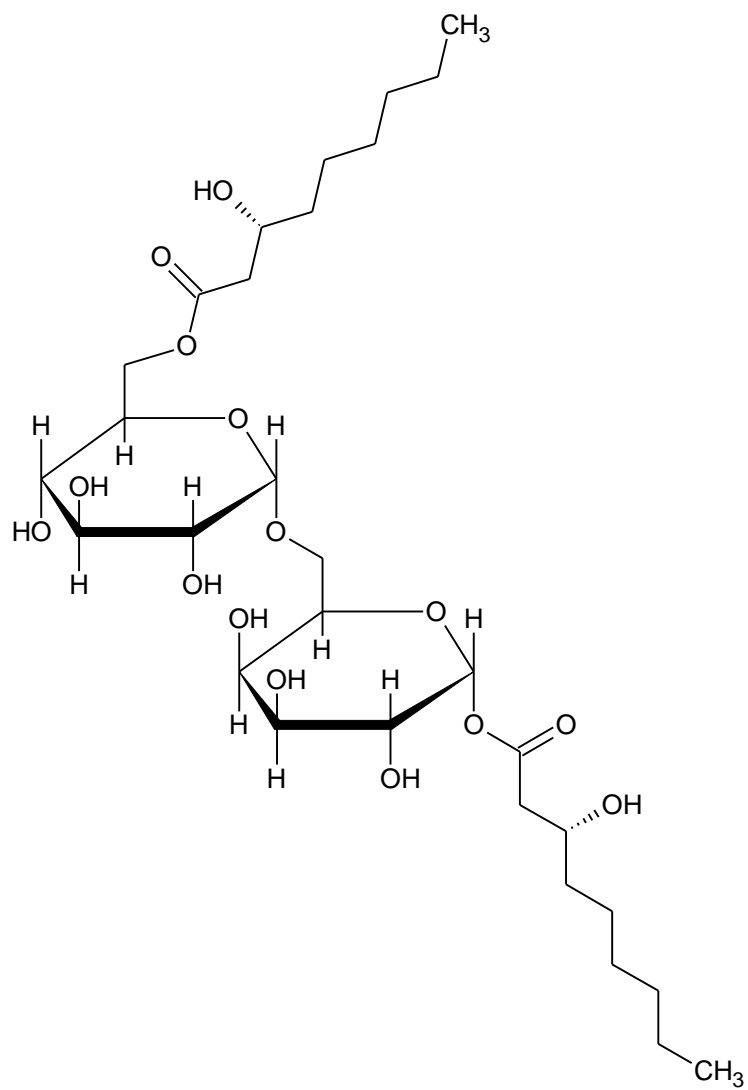

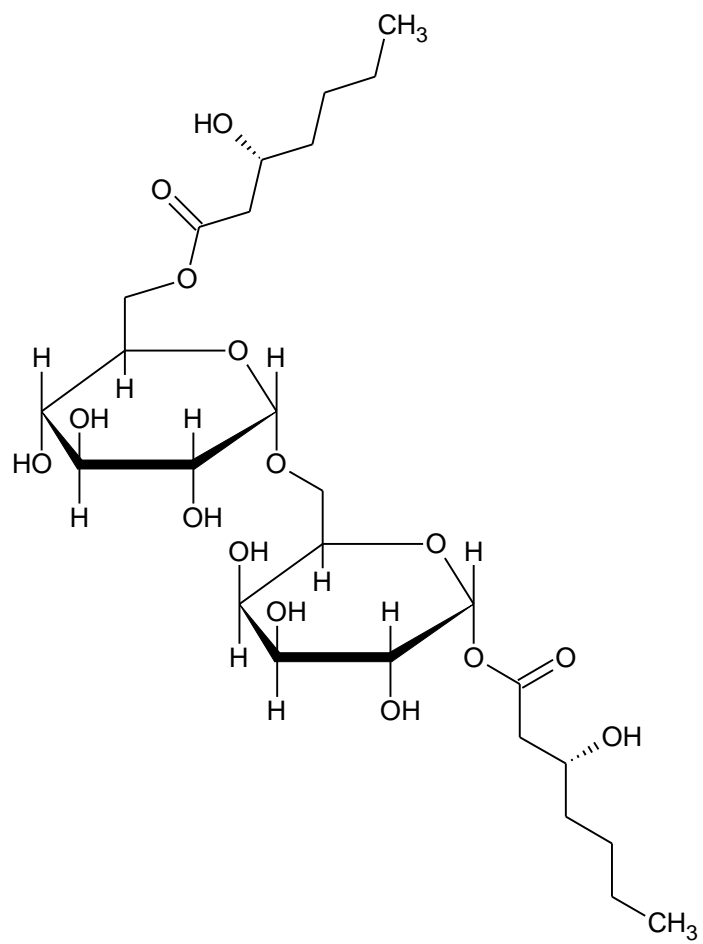

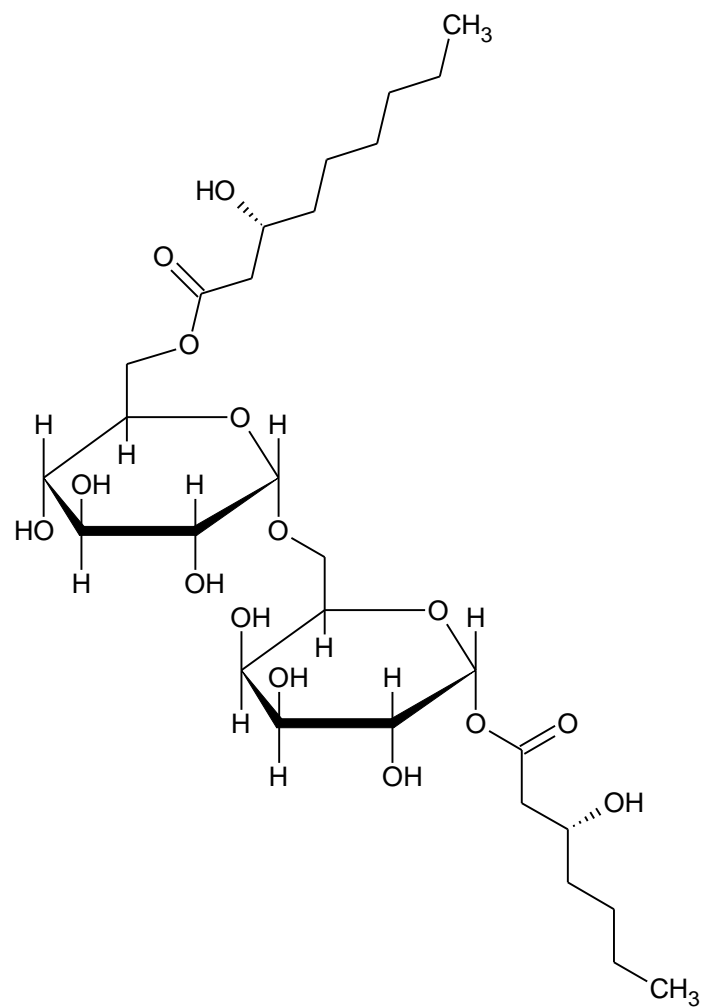

- o) **mPHN-lac**: mixture of (3*R*)-hydroxynonanoate lactose and (3*R*)-hydroxyheptanoate lactose mono and diesters



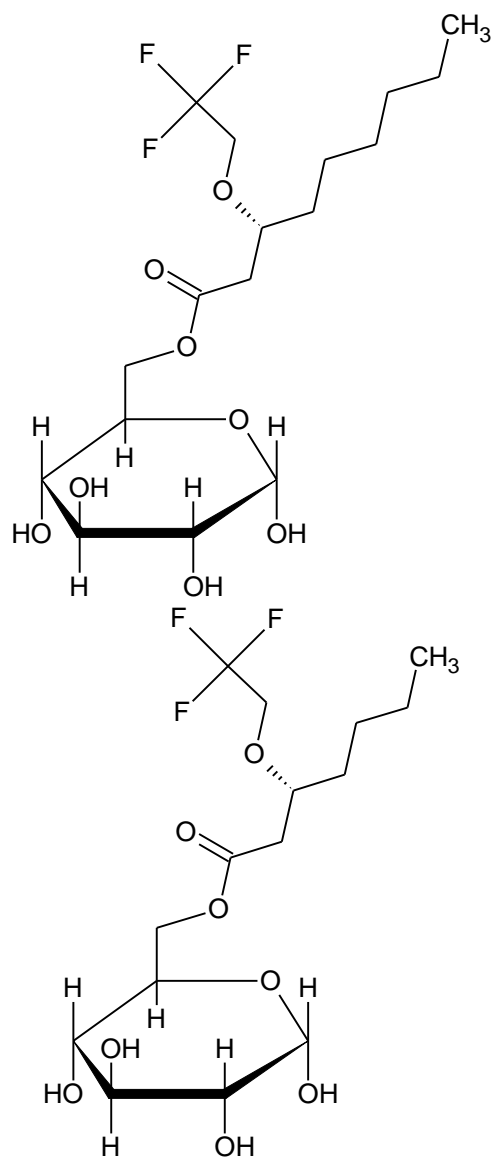

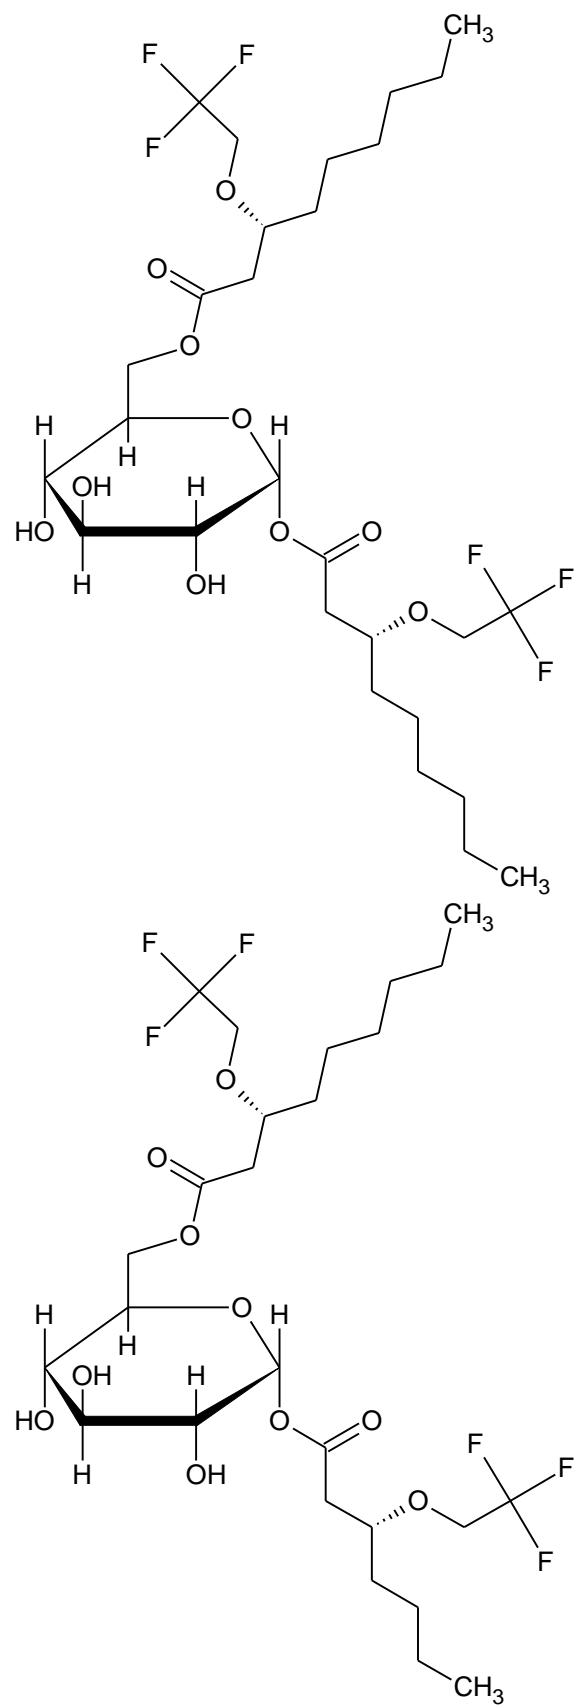

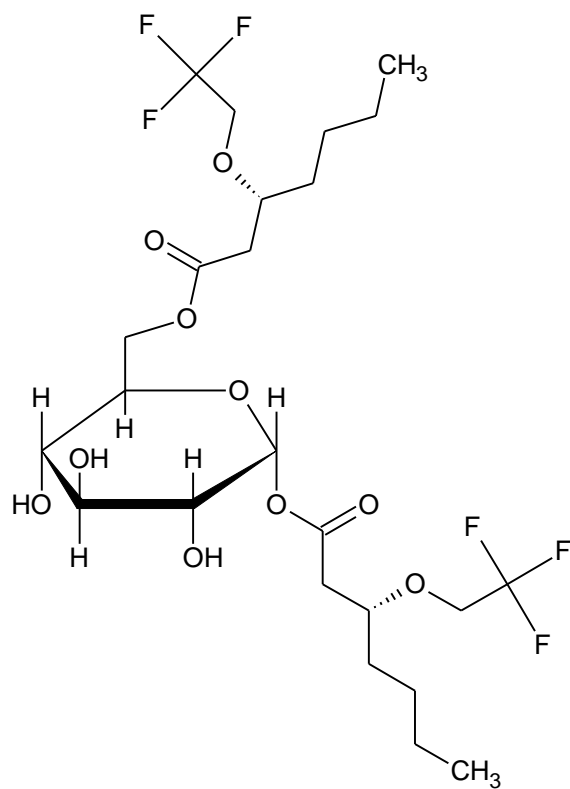

p) **F-mPHN-glu**: mixture of (3*R*)-3-(2,2,2-trifluoroethoxy)nonanoate glucose and (3*R*)-3-(2,2,2-trifluoroethoxy)heptanoate glucose mono and esters

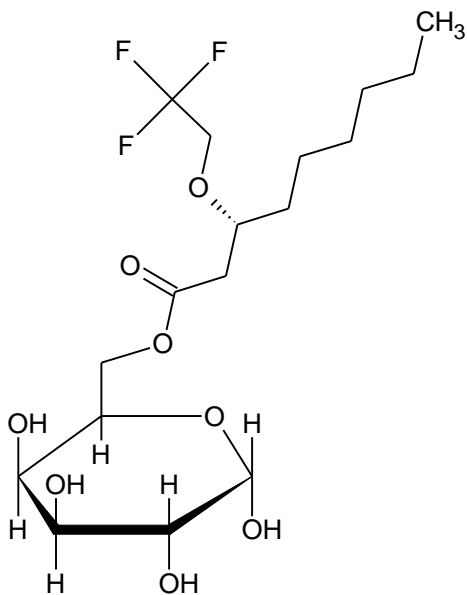

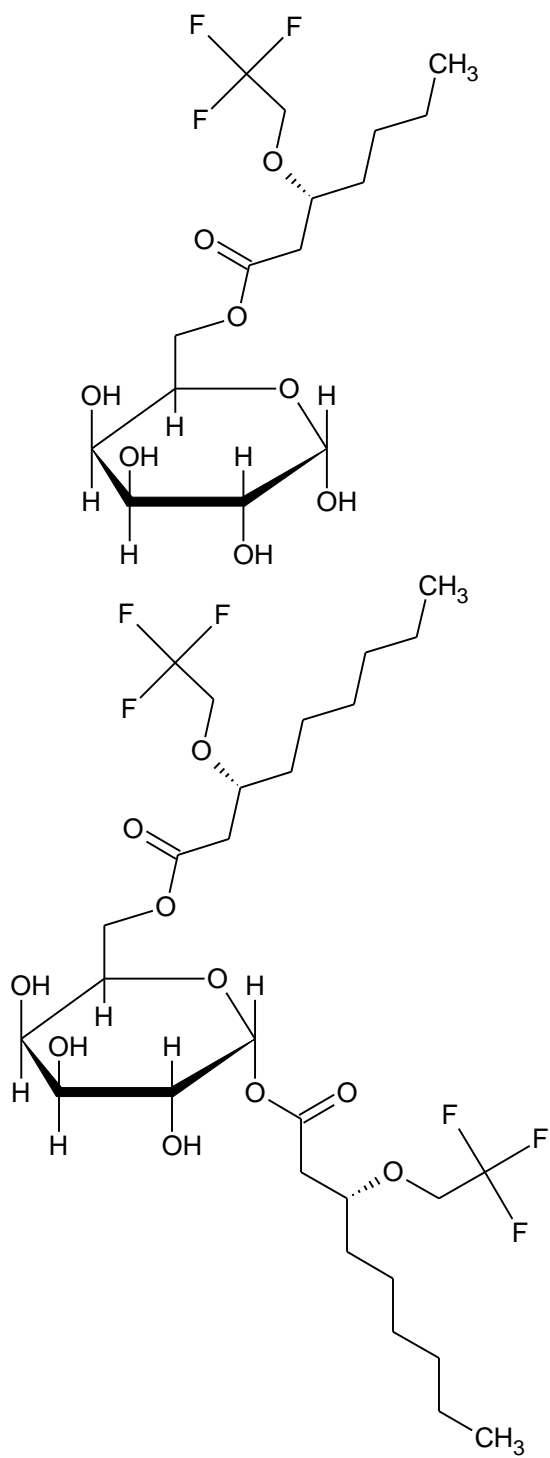

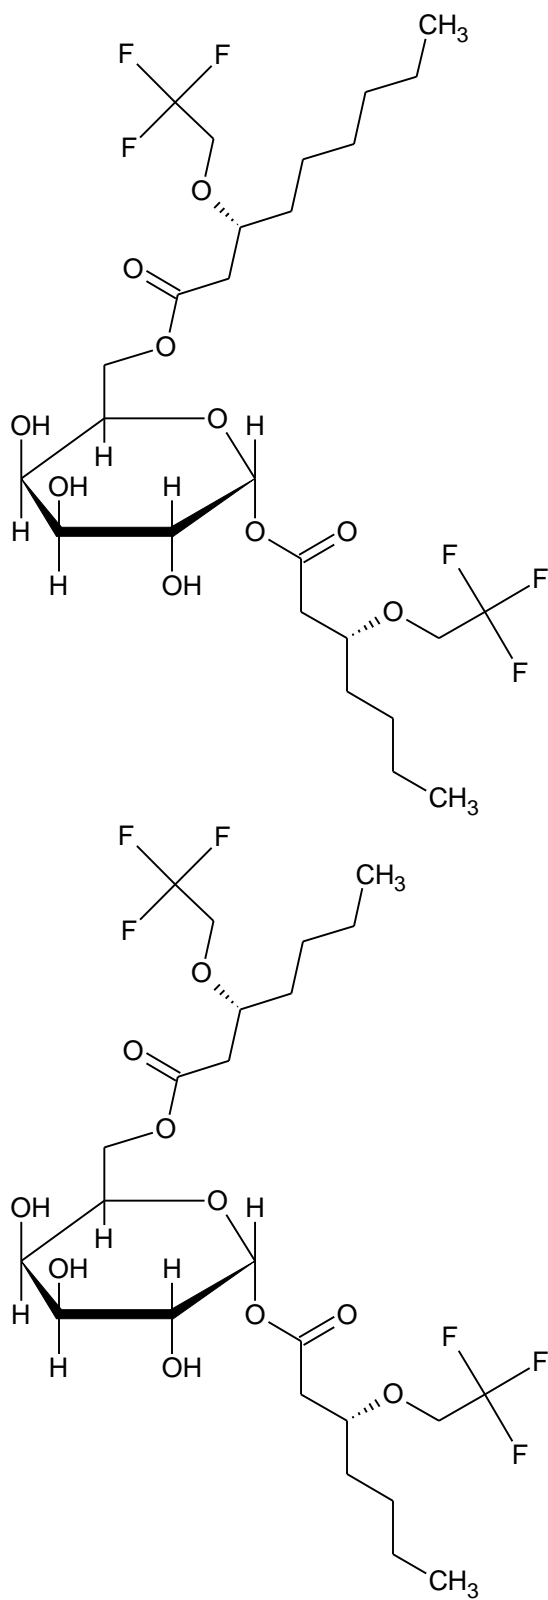

r) **F-mPHN-gal**: mixture of (3R)-3-(2,2,2-trifluoroethoxy)nonanoate galactose and (3R)-3-(2,2,2-trifluoroethoxy)heptanoate galactose mono and diesters

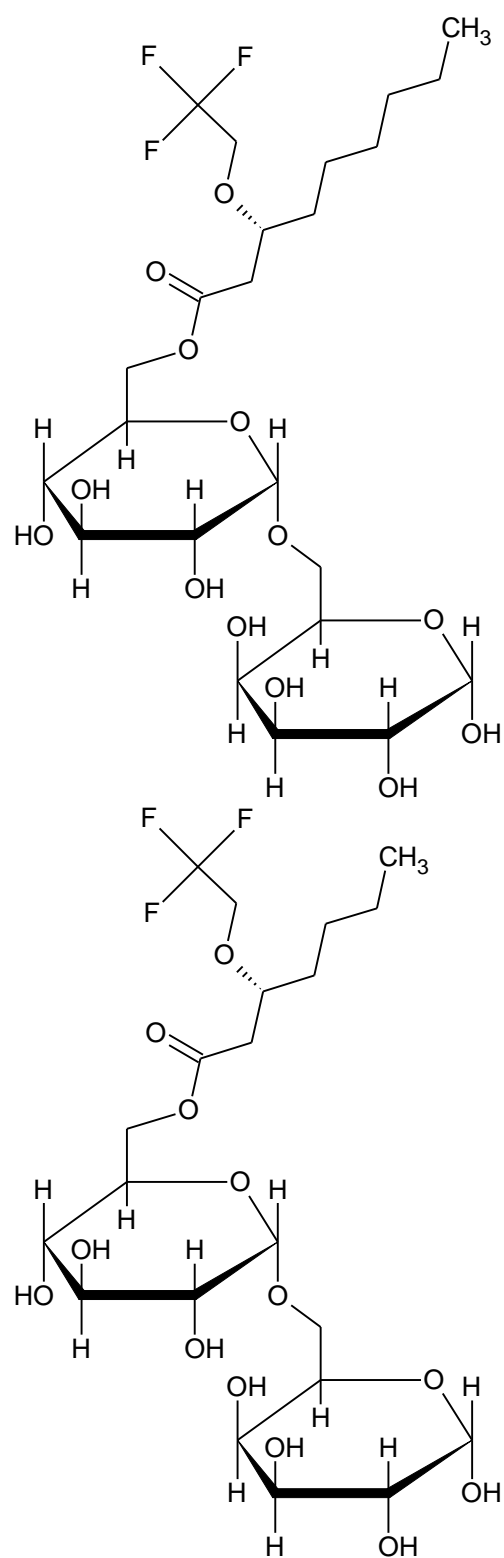

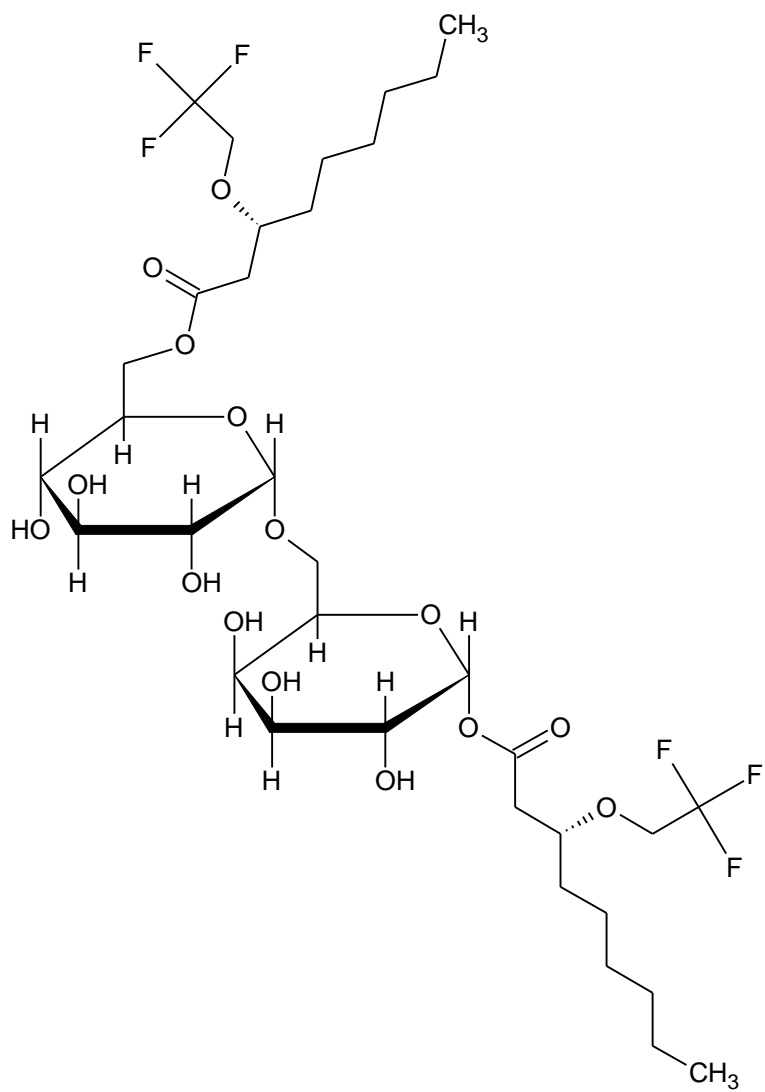

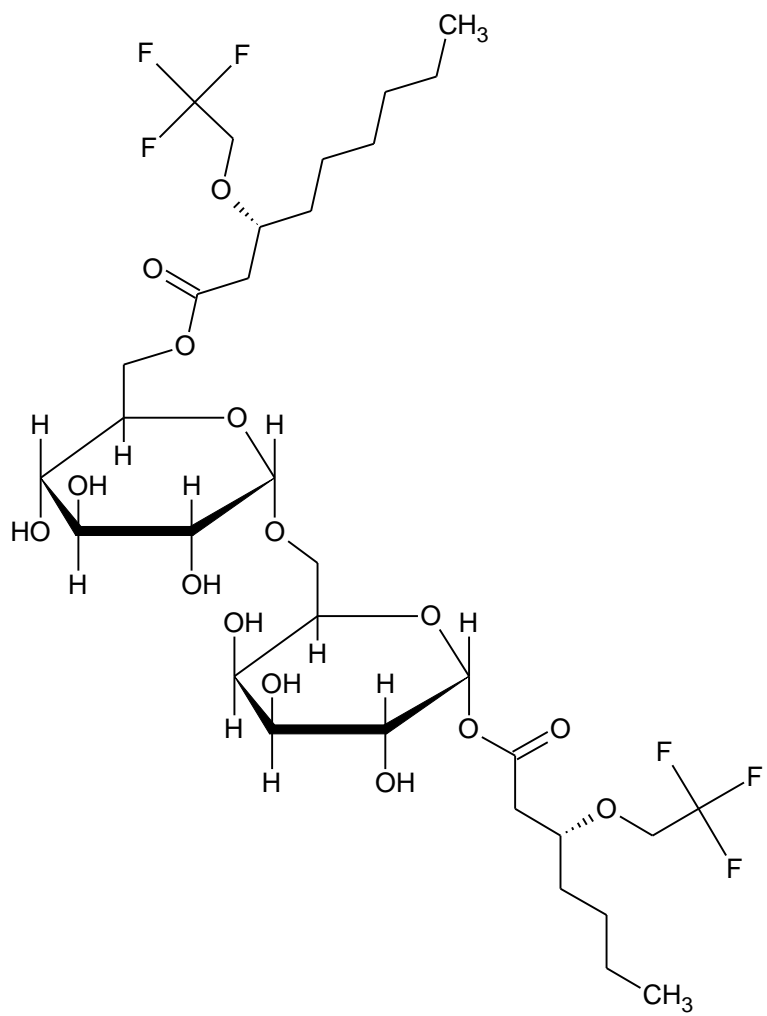



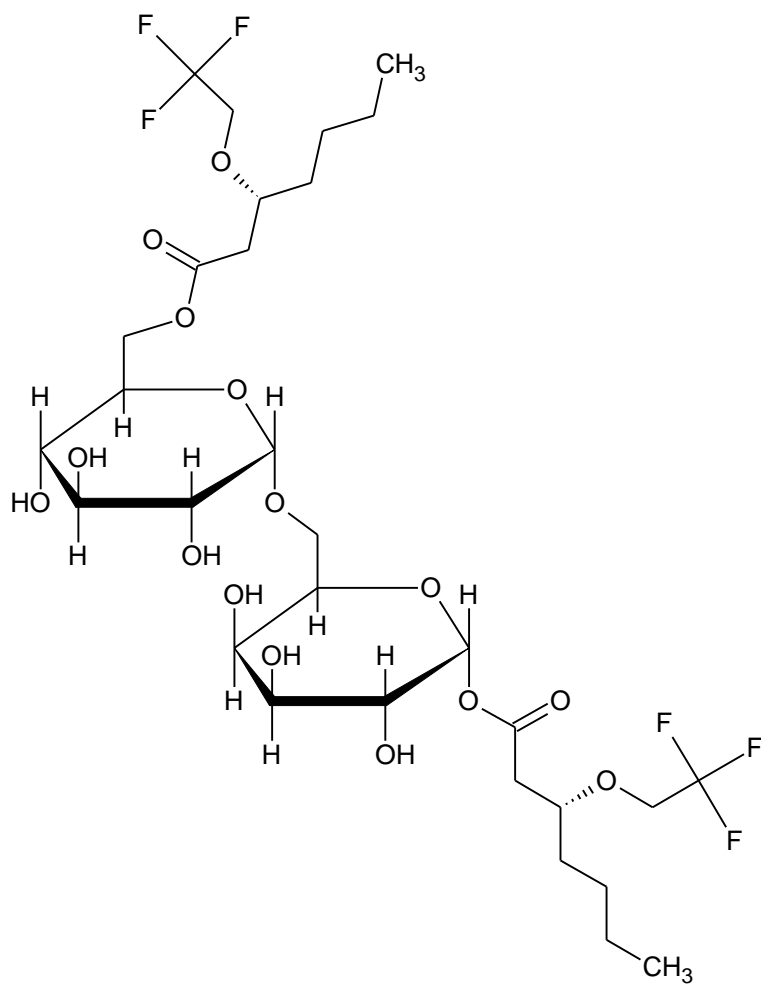

s) **F-mPHN-lac**: mixture of (3*R*)-3-(2,2,2-trifluoroethoxy)nonanoate lactose and (3*R*)-3-(2,2,2-trifluoroethoxy)heptanoate lactose mono and diesters

**Fig 1. List of compound names, shortcuts and structures generated in ChemSketch**

**Table 1. Precursor and product ions of sugar esters obtained in MRM LC-MS QQQ analysis:**

| Compound:     |                                                | MRM: Precursor ion -> product ion                    | Fragmentor: | Collision energy: |
|---------------|------------------------------------------------|------------------------------------------------------|-------------|-------------------|
| C9-gluc       | C9 monoester                                   | [M+K] <sup>-</sup> : 359.14 -> 341.3                 | 93          | 6                 |
|               |                                                | [M+K] <sup>-</sup> : 359.14 -> 193.3                 |             | 18                |
|               |                                                | [M+K] <sup>-</sup> : 359.14 -> 41.1                  |             | 74                |
|               |                                                | [M+K] <sup>-</sup> : 359.14 -> 202.5                 |             | 26                |
|               | C9 C9 diester                                  | [M+Na] <sup>+</sup> : 483.69 -> 69                   | 142         | 22                |
| C9-gal:       | C9 monoester                                   | [M+K] <sup>-</sup> : 359.14 -> 341.3                 | 98          | 6                 |
|               |                                                | [M+K] <sup>-</sup> : 359.14 -> 43.1                  |             | 54                |
|               |                                                | [M+K] <sup>-</sup> : 359.14 -> 202.4                 |             | 18                |
|               | C9 C9 diester                                  | [M+Na] <sup>+</sup> : 483.69 -> 69                   | 142         | 22                |
| C9-lac:       | C9 monoester                                   | [M+H <sub>2</sub> O+H] <sup>-</sup> : 517.2 -> 157.1 | 136         | 22                |
|               |                                                | [M+H <sub>2</sub> O+H] <sup>-</sup> : 517.2 -> 282.1 |             | 46                |
|               | C9 C9 diester                                  | [M+Na] <sup>+</sup> : 657.3 -> 157.1                 | 131         | 30                |
| mPHN- gluc:   | C9 monoester                                   | [M+Cl] <sup>-</sup> : 371.15 -> 35                   | 98          | 14                |
|               | C7 monoester                                   | [M+K] <sup>+</sup> : 429.11 -> 73.1                  | 132         |                   |
|               |                                                | [M+MeOH] <sup>+</sup> : 340.15 -> 295.7              |             | 6                 |
|               |                                                | [M+MeOH] <sup>+</sup> : 340.15 -> 180.4              |             | 26                |
|               | C9 C9 diester                                  | [M+Cl] <sup>-</sup> : 527.26 -> 35                   | 137         | 30                |
|               | C7 C7 diester                                  | -                                                    | -           | -                 |
|               | C9 C7 diester                                  | [M+Cl] <sup>-</sup> : 499.23 -> 35                   | 137         | 18                |
| mPHN- gal:    | C9 monoester                                   | [M+Cl] <sup>-</sup> : 371.15 -> 35                   | 98          | 14                |
|               | C7 monoester                                   | [M+K] <sup>+</sup> : 429.11 -> 73.1                  |             |                   |
|               | C9 C9 diester                                  | [M+H] <sup>+</sup> : 493.3 -> 59.1                   | 113         | 18                |
|               |                                                | [M+H] <sup>+</sup> : 493.3 -> 42.1                   |             | 126               |
|               | C7 C7 diester                                  | [M+H] <sup>+</sup> : 437.24 -> 23.1                  | 181         | 30                |
|               |                                                |                                                      |             |                   |
| mPHN -lac:    | C9 monoester                                   | [M+H <sub>2</sub> O+H] <sup>-</sup> : 517.2 -> 157.1 | 116         | 26                |
|               |                                                | 517.2 -> 282.1                                       | 116         | 38                |
|               | C9 C9 diester                                  | [M+Na] <sup>+</sup> : 657.3 -> 157.1                 | 111         | 26                |
|               | C9 monoester                                   | [M+K] <sup>+</sup> : 457.14 -> 23                    | 172         | 34                |
| F-mPHN- gluc: | C7 monoester                                   | [M+K] <sup>+</sup> : 429.11 -> 73.1                  | 245         | 46                |
|               |                                                | [M+K] <sup>+</sup> : 429.11 -> 45                    |             | 94                |
|               |                                                | [M+K] <sup>+</sup> : 429.11 -> 43.1                  |             | 178               |
|               |                                                | [M+K] <sup>+</sup> : 429.11 -> 218.7                 |             | 22                |
|               | C9 C9 diester with two -CF <sub>3</sub>        | [M+MeOH] <sup>+</sup> : 688.3 -> 73.1                | 147         | 70                |
|               |                                                | [M+MeOH] <sup>+</sup> : 688.3 -> 355.1               |             | 26                |
|               | C9 C7 diester with one -CF <sub>3</sub>        | [M+Na] <sup>+</sup> : 651.26 -> 73                   | 235         | 78                |
|               |                                                | [M+Na] <sup>+</sup> : 651.26 -> 45.1                 |             | 166               |
|               | C9 C7 diester with one -CF <sub>3</sub>        | [M-H] <sup>-</sup> : 627.26 -> 325                   | 191         | 38                |
| F-mPHN- gal:  | C9 C7 diester with two -CF <sub>3</sub>        | [M+H] <sup>+</sup> : 629.28 -> 324.4                 | 113         | 14                |
|               | C7 C7 diester with one -CF <sub>3</sub> group  | [M+H] <sup>+</sup> : 457.14 -> 23.1                  | 167         | 38                |
| F-mPHN- lac:  | C9 C9 diester with two -CF <sub>3</sub> groups | [M+MeOH] <sup>+</sup> : 851.36 -> 73.1               | 162         | 114               |
|               |                                                | [M+MeOH] <sup>+</sup> : 851.36 -> 436.4              |             | 50                |
|               | C9 C9 diester with one -CF <sub>3</sub> group  | [M+Na] <sup>+</sup> : 759.34 -> 73.1                 | 127         | 78                |
|               |                                                | [M+Na] <sup>+</sup> : 759.34 -> 45                   |             | 190               |
|               | C7C7diester with one -CF <sub>3</sub>          | [M+Na] <sup>+</sup> : 703.28 -> 355.1                | 118         | 30                |
|               | C7C7 with two -CF <sub>3</sub> groups          | [M+Na] <sup>+</sup> : 833.28 -> 73.1                 | 181         | 122               |
|               |                                                | [M+Na] <sup>+</sup> : 833.28 -> 45                   |             | 198               |

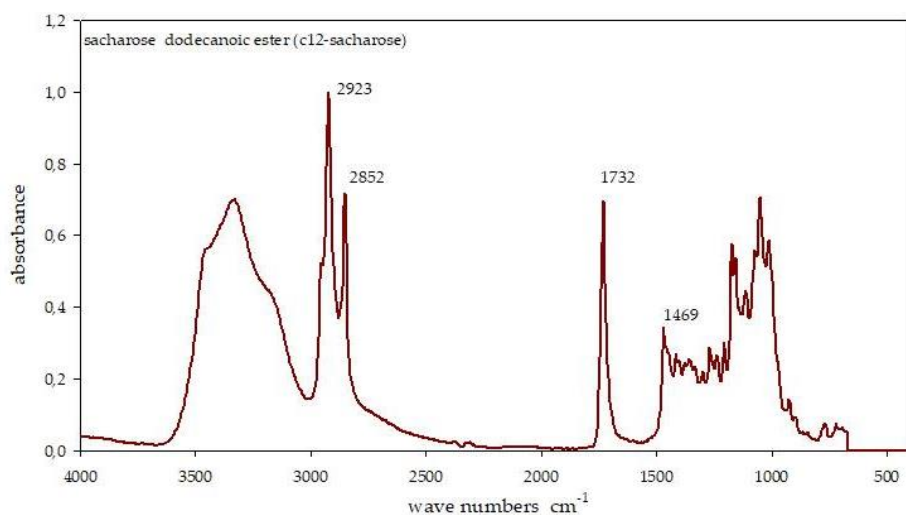

**Fig 2.** IR spectrum of C12- (sucrose monolaurate) as a referring compound

Following peaks inform about:

- Stretching vibrations: 3000- 3500  $\text{cm}^{-1}$  indicate presence -OH group
- Stretching vibrations: 2900  $\text{cm}^{-1}$  come from  $-\text{CH}_2$  aliphatic residues
- Stretching vibrations around 1725  $\text{cm}^{-1}$  responsible for ester bonds

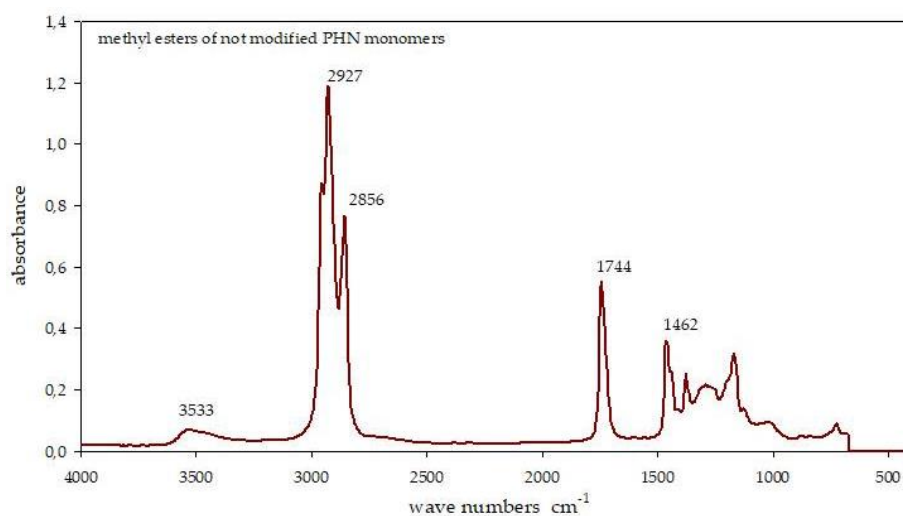

**Fig 3.** IR spectra of methyl esters of not modified PHN monomers (mixture of 3-(*R*)- hydroxynonanoic and 3-(*R*)- hydroxyheptanoic acids)

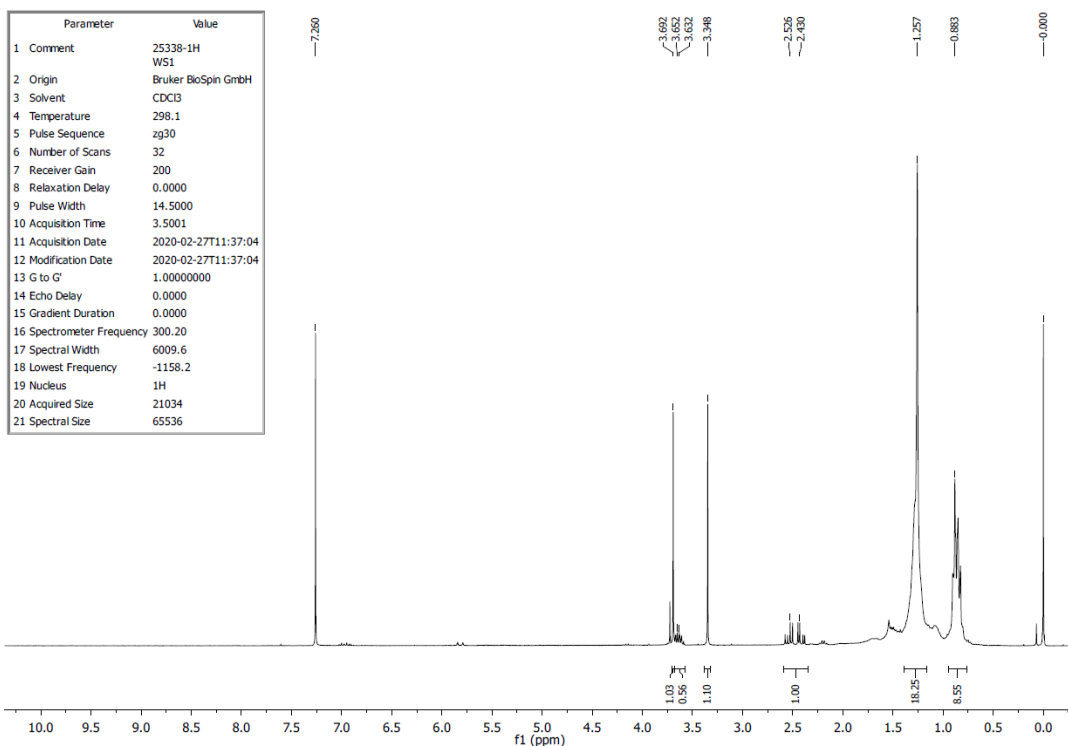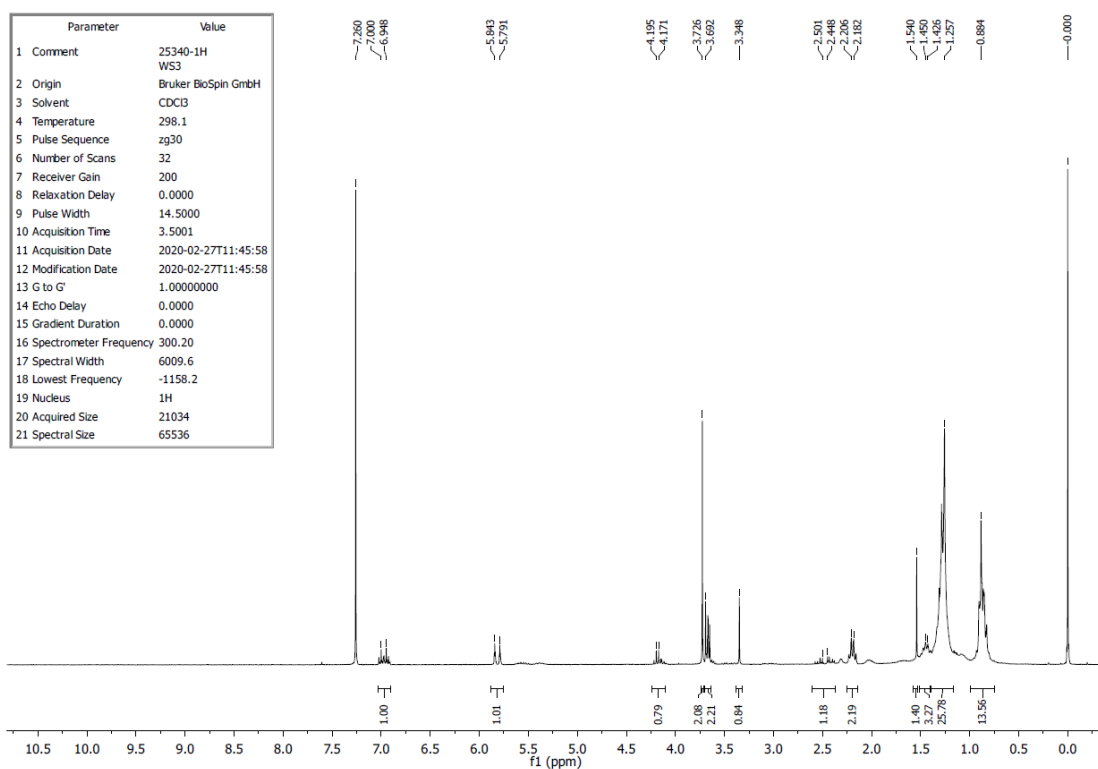

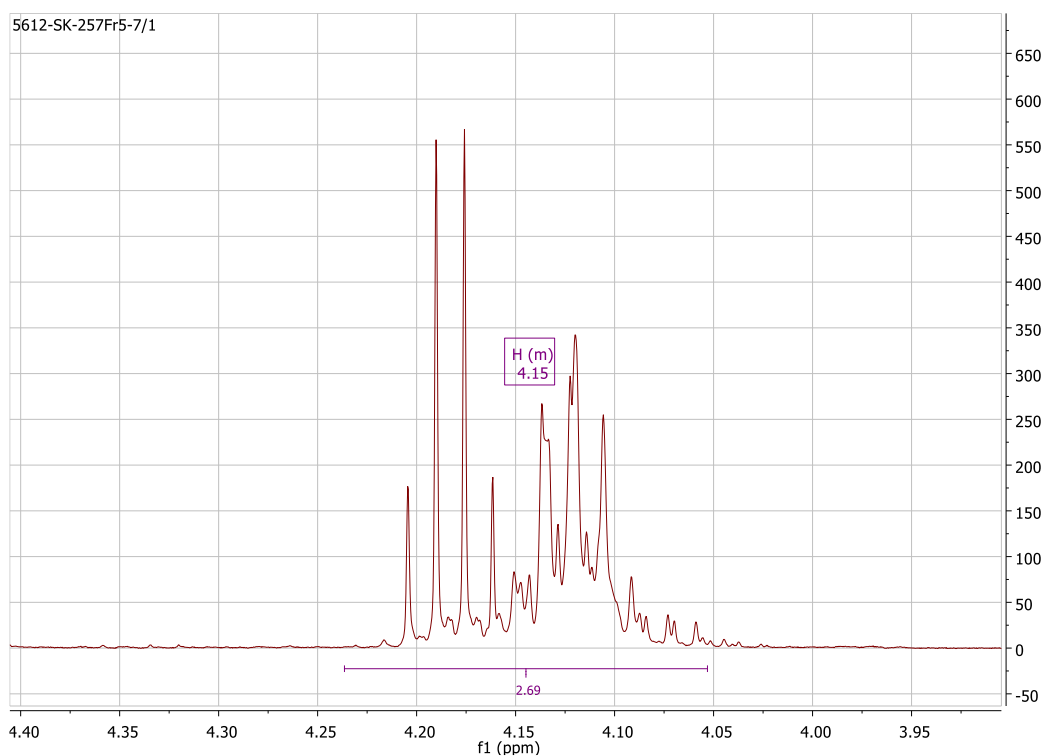

a)  $^1\text{H}$ NMR spectra

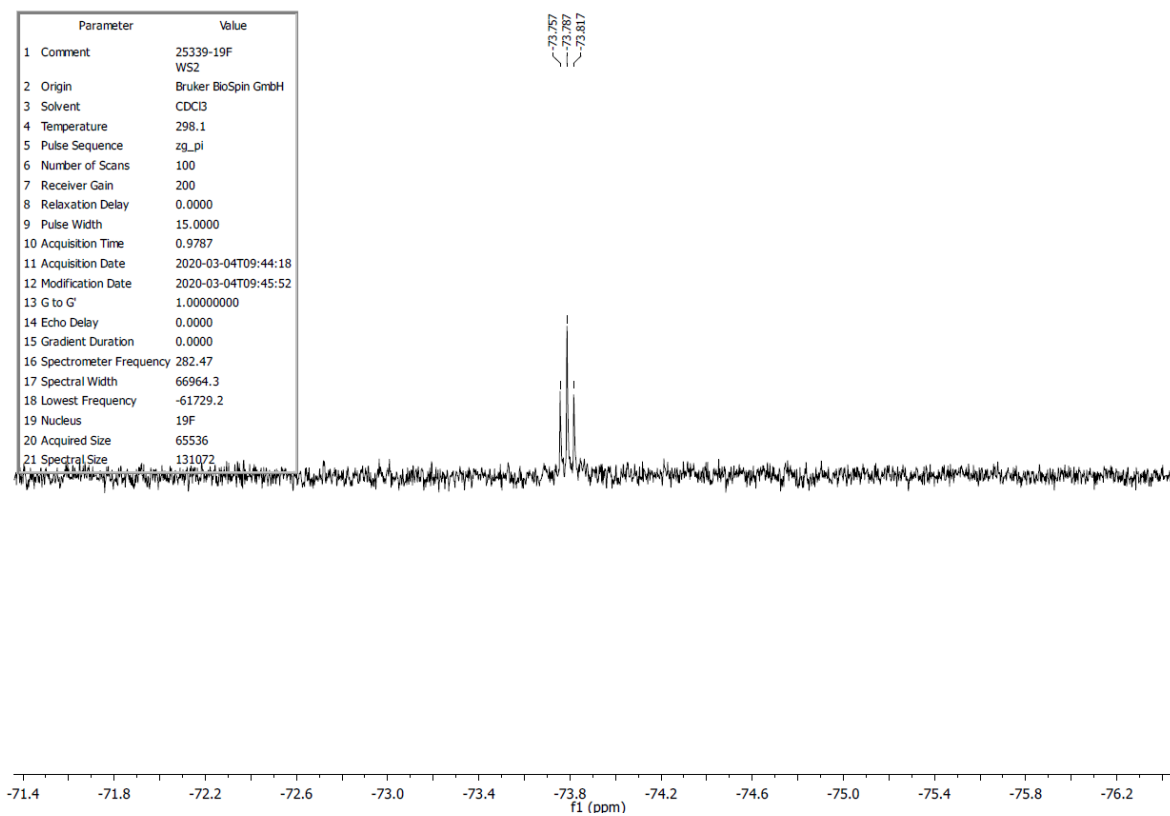

b)  $^{19}\text{F}$  NMR spectra of the modified PHN monomers confirmed a presence of fluorine moieties

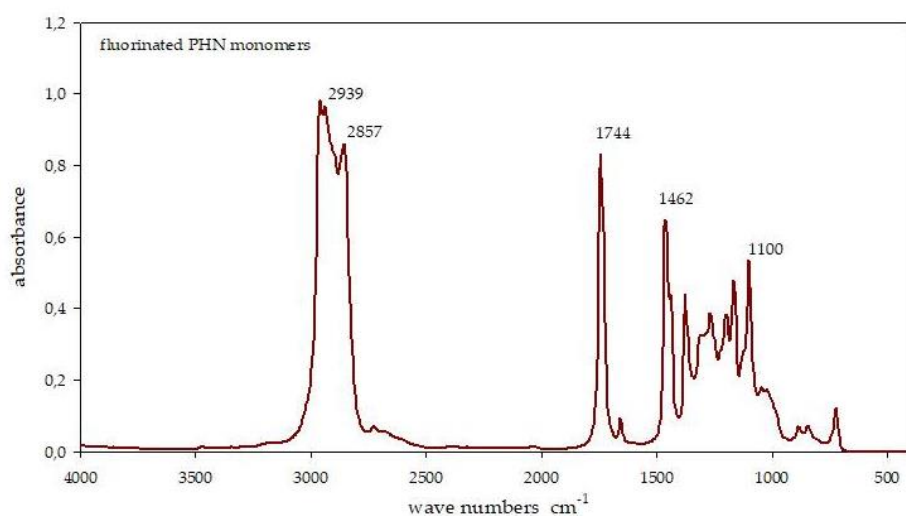

c) IR spectra of the purified PHN mixture after modification

**Fig 4.** Spectra analysis of methyl esters of methyl esters of 3-(R)- (2 -2'- 2''- trlifuoroethyl)-nonanoic and heptanoic acids (fluorinated PHN monomers or mPHN-F)

#### IR Spectra description:

Stretching vibrations between  $\sim 1360\text{-}1090\text{ cm}^{-1}$  suggests presence of  $\text{-CF}_3$  groups

Stretching vibrations between  $\sim 1360\text{-}1000\text{ cm}^{-1}$  and  $1110\text{-}1000\text{ cm}^{-1}$  suggests presence of  $\text{-CF}$  bonds

And  $2859\text{ cm}^{-1}$  for  $\text{-C-O-C}$  etheric bonds

$1734\text{ cm}^{-1}$  stretching vibrations inform about presence of ester bonds between methyl groups and carboxyl groups of PHN monomers

Spectrum profile refers to inverted IR spectra of 2,2,2-Trifluoroethyl Methyl Ether taken from:

*"Low-Resolution Microwave, Infrared, and Raman Spectra, Conformational Stability, and Vibrational Assignment of 2,2,2-Trifluoroethyl Methyl Ether"*; J. Phys. Chem. 1987, 91, 1334-1344

Additionally, lack of large peak between  $3000\text{-}3500\text{ cm}^{-1}$  suggests  $\text{-OH}$  groups are not present in a structure of the analyzed compound which confirms that reaction of protecting  $\text{-OH}$  group occurred

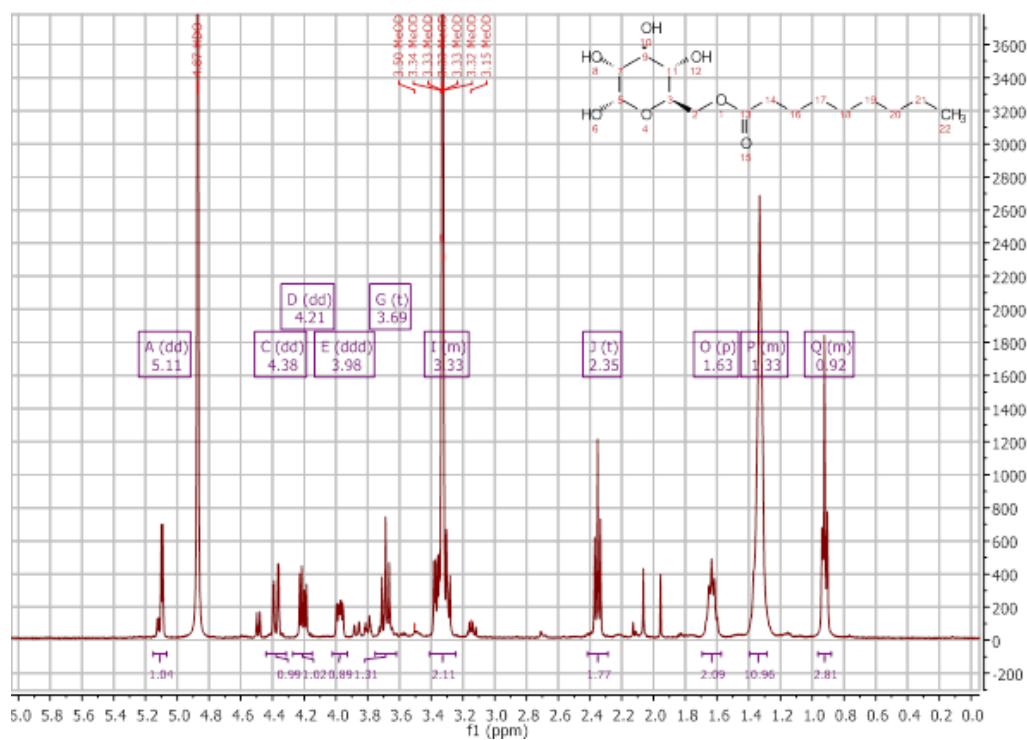

| Parameter                 | Value                  |
|---------------------------|------------------------|
| 1 Comment                 | 24734-1H<br>C9-Glucose |
| 2 Origin                  | Bruker BioSpin GmbH    |
| 3 Solvent                 | MeOD                   |
| 4 Temperature             | 298.1                  |
| 5 Pulse Sequence          | zg30                   |
| 6 Number of Scans         | 64                     |
| 7 Receiver Gain           | 129                    |
| 8 Relaxation Delay        | 0.0000                 |
| 9 Pulse Width             | 14.5000                |
| 10 Acquisition Time       | 3.5001                 |
| 11 Acquisition Date       | 2019-12-23T09:16:29    |
| 12 Modification Date      | 2019-12-23T09:16:30    |
| 13 G to G'                | 1.00000000             |
| 14 Echo Delay             | 0.0000                 |
| 15 Gradient Duration      | 0.0000                 |
| 16 Spectrometer Frequency | 300.20                 |
| 17 Spectral Width         | 6009.6                 |
| 18 Lowest Frequency       | -1156.7                |
| 19 Nucleus                | 1H                     |
| 20 Acquired Size          | 21034                  |
| 21 Spectral Size          | 65536                  |

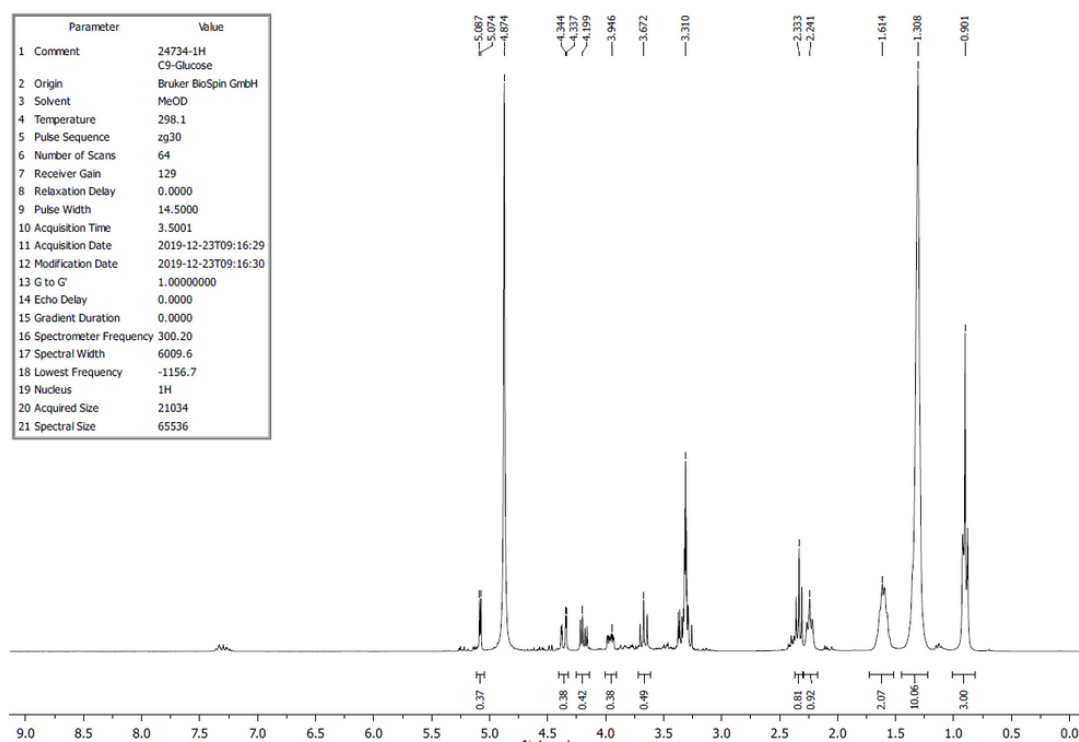

a)  $^1\text{H}$ NMR spectra

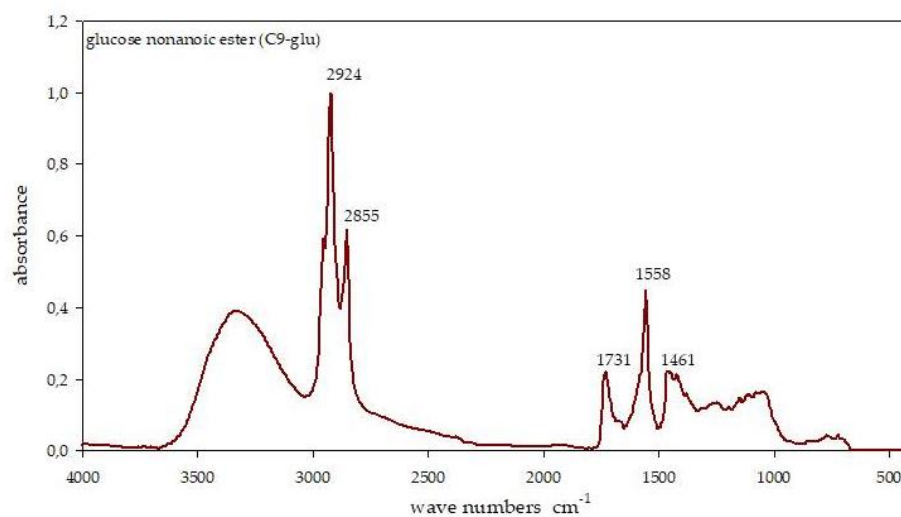

b) IR spectra

Fig 5. Spectral analysis of glucose nonanoate (C9-glu)

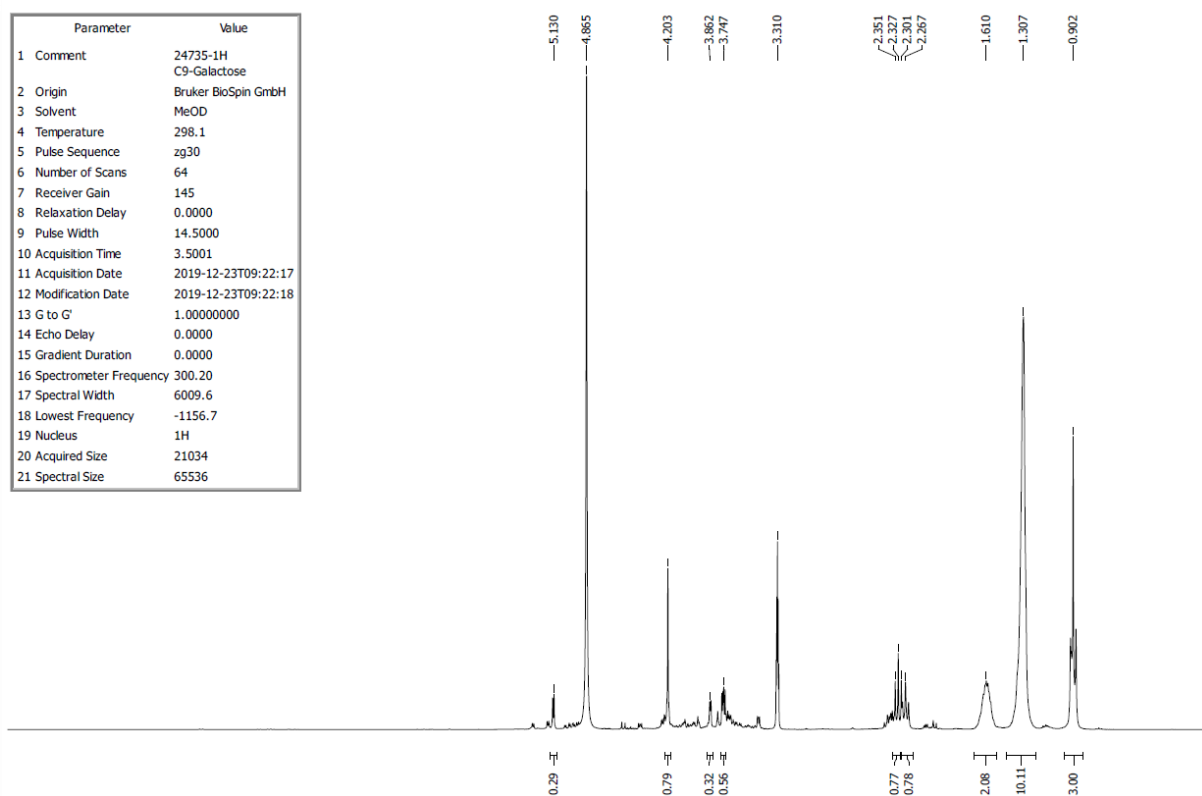



a)  $^1\text{H}$ NMR spectra

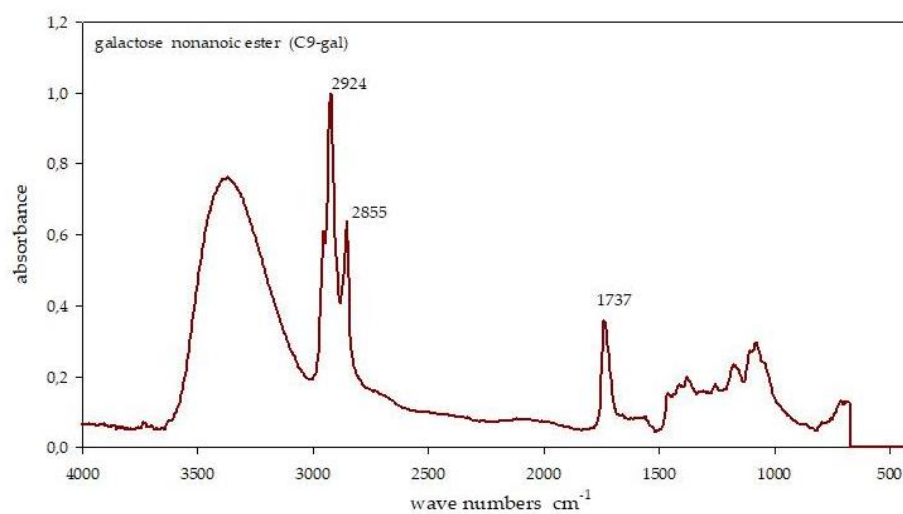

a) IR spectra

**Fig 6.** Spectral analysis galactose nonanoate (C9-gal)

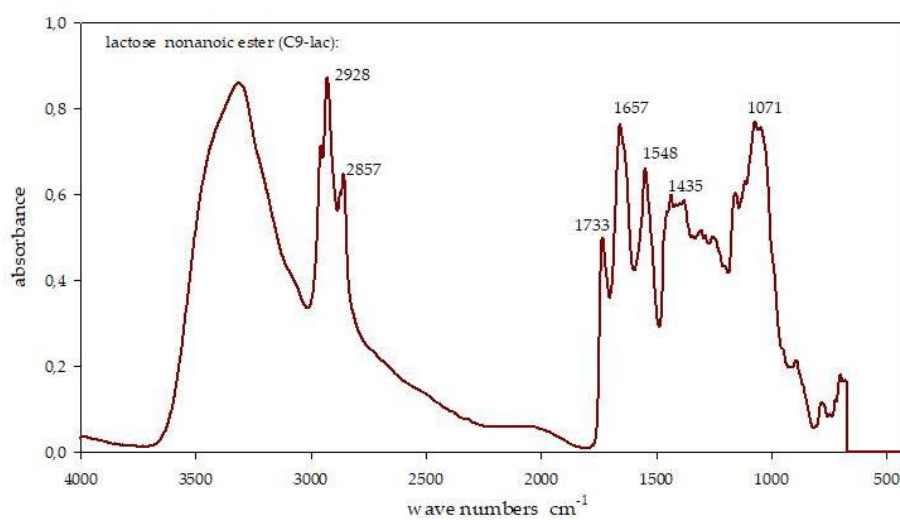

**Fig 7.** IR spectra of lactose nonanoate (C9-lac)

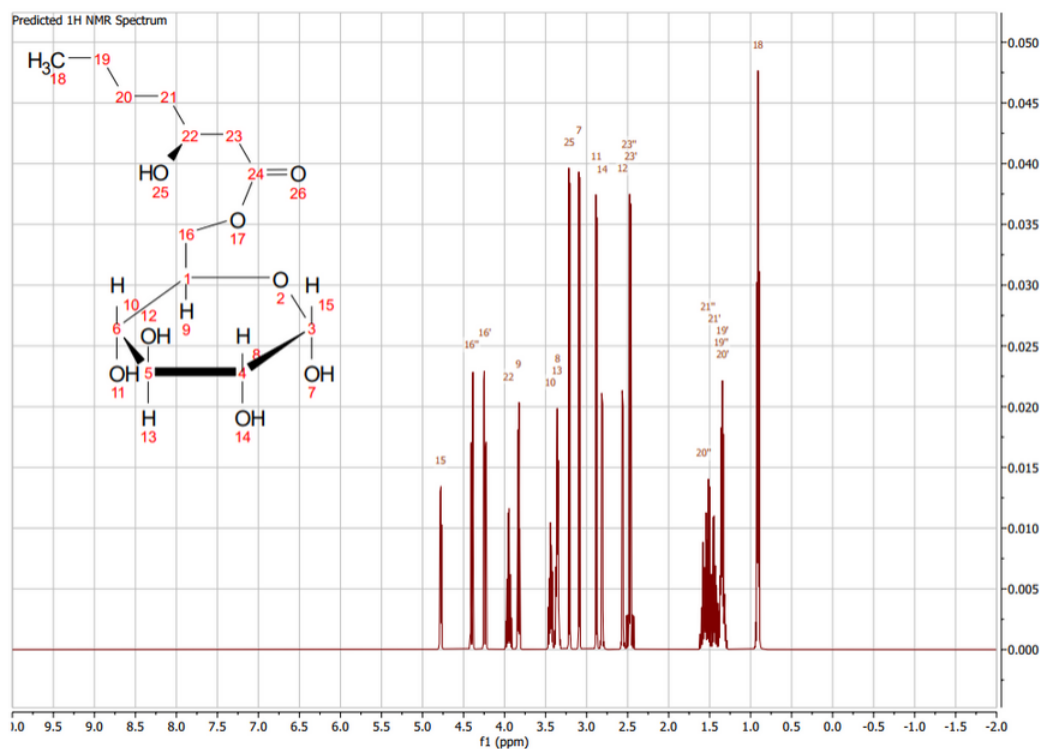

a)  $^1\text{H}$ NMR spectra prediction

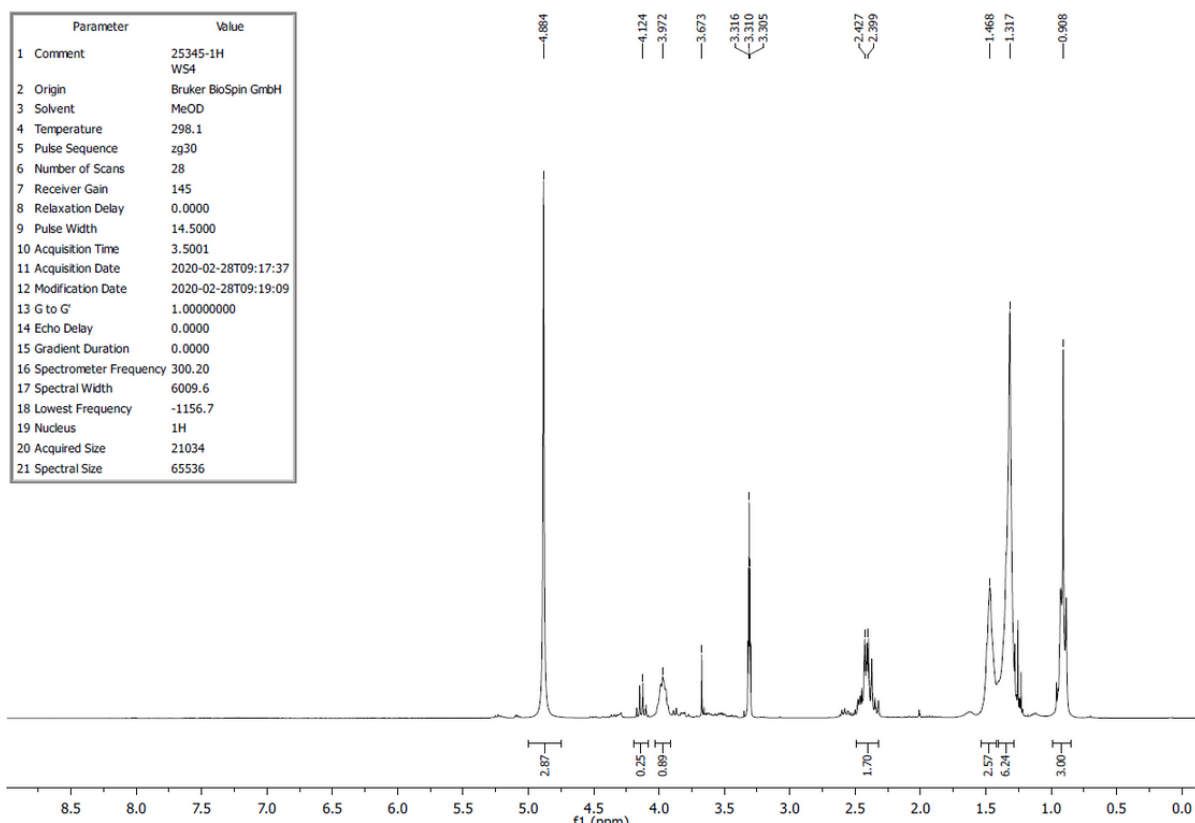

b)  $^1\text{H}$ NMR spectra:  $^1\text{H}$  NMR (300 MHz, Methanol- $d_4$ )  $\delta$  4.93 (s, 3H), 4.10 – 3.89 (m, 1H), 3.33

(td,  $J$  = 3.7, 2.1 Hz, 1H), 2.55 – 2.29 (m, 2H), 1.62 – 1.21 (m, 12H), 1.02 – 0.85 (m, 3H)

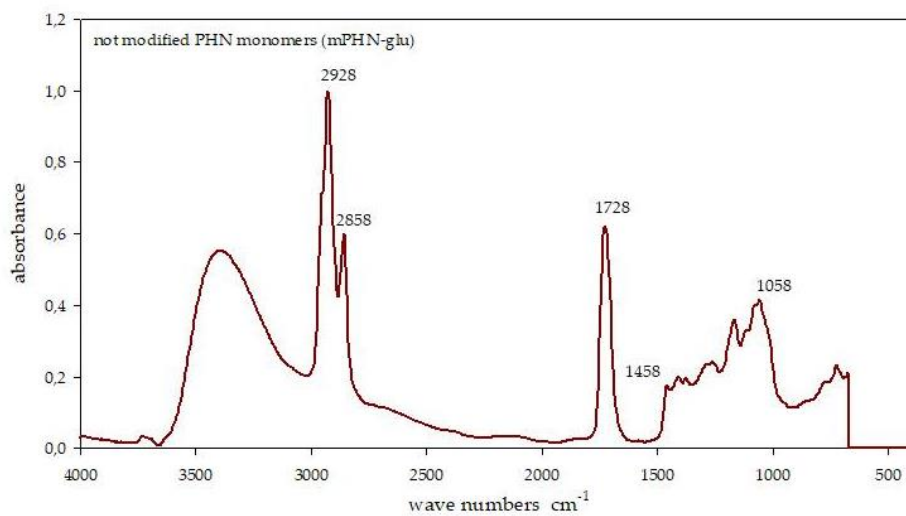

c) IR spectra

**Fig 8.** Spectral analysis of glucose mono and diesters esters originated from mixture of not modified PHN monomers (mPHN-glu)

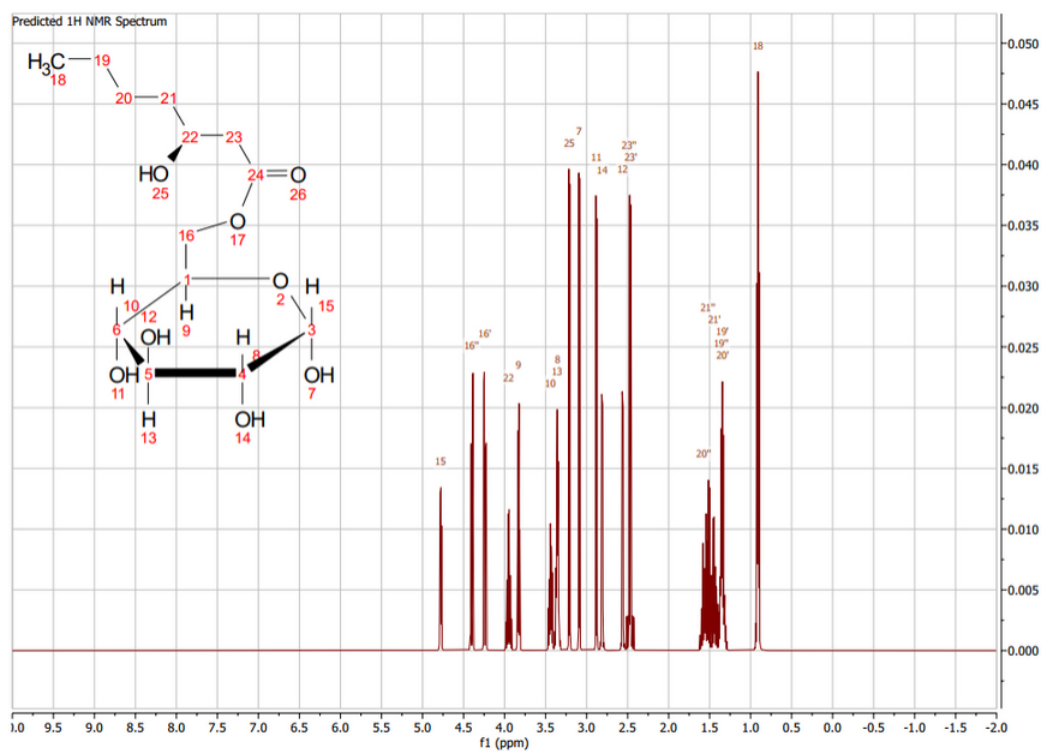

a) <sup>1</sup>H NMR spectra prediction

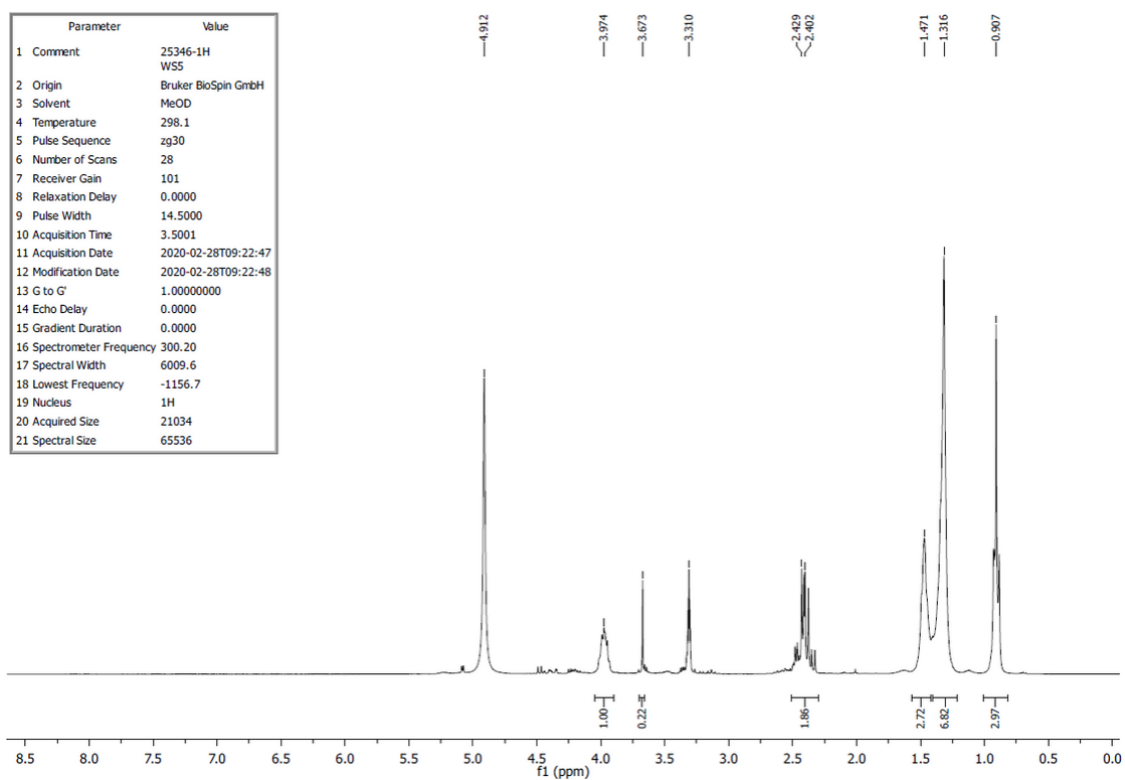

b) <sup>1</sup>H NMR spectra: <sup>1</sup>H NMR (300 MHz, Methanol-d<sub>4</sub>) δ 4.94 (s, 3H), 3.99 (dtd, *J* = 9.5, 7.0, 3.4 Hz, 1H), 3.33 (p, *J* = 1.7 Hz, 1H), 2.54 – 2.28 (m, 2H), 1.63 – 1.22 (m, 12H), 1.03 – 0.84 (m, 3H).

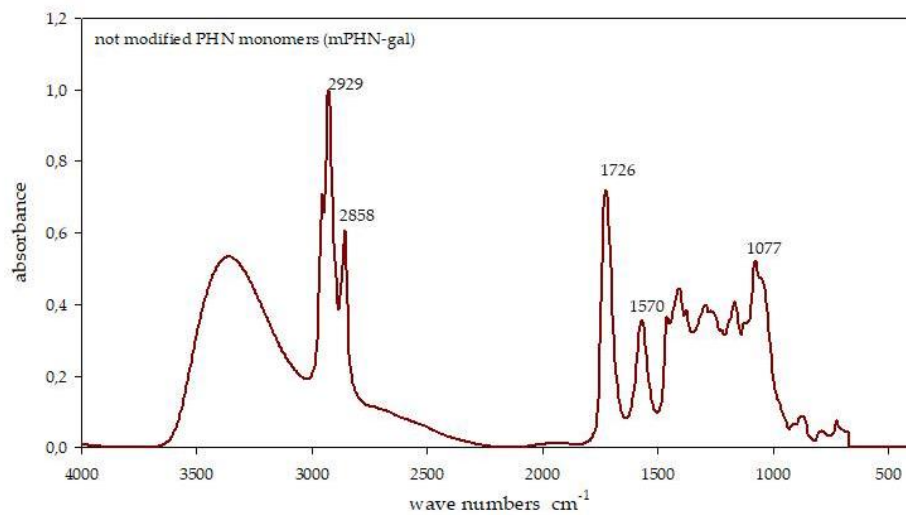

c) IR spectra

**Fig 9.** Spectral analysis of galactose mono and diesters esters originated from mixture of not modified PHN monomers (mPHN-gal)

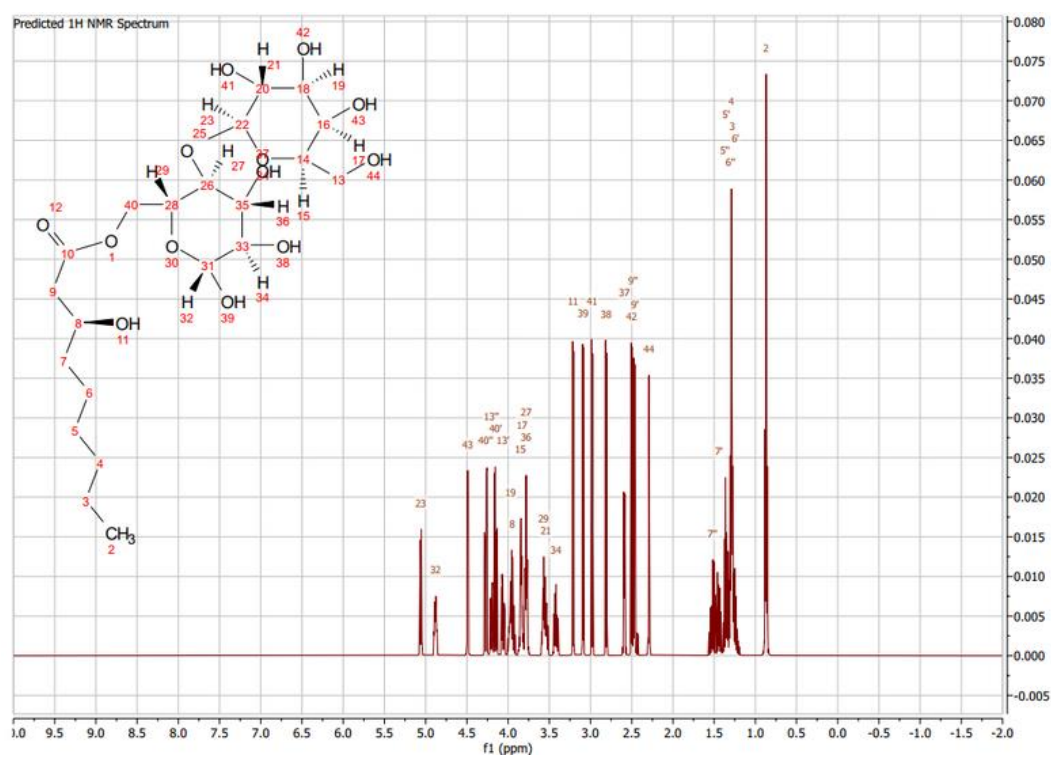

a)  $^1\text{H}$ NMR spectra prediction

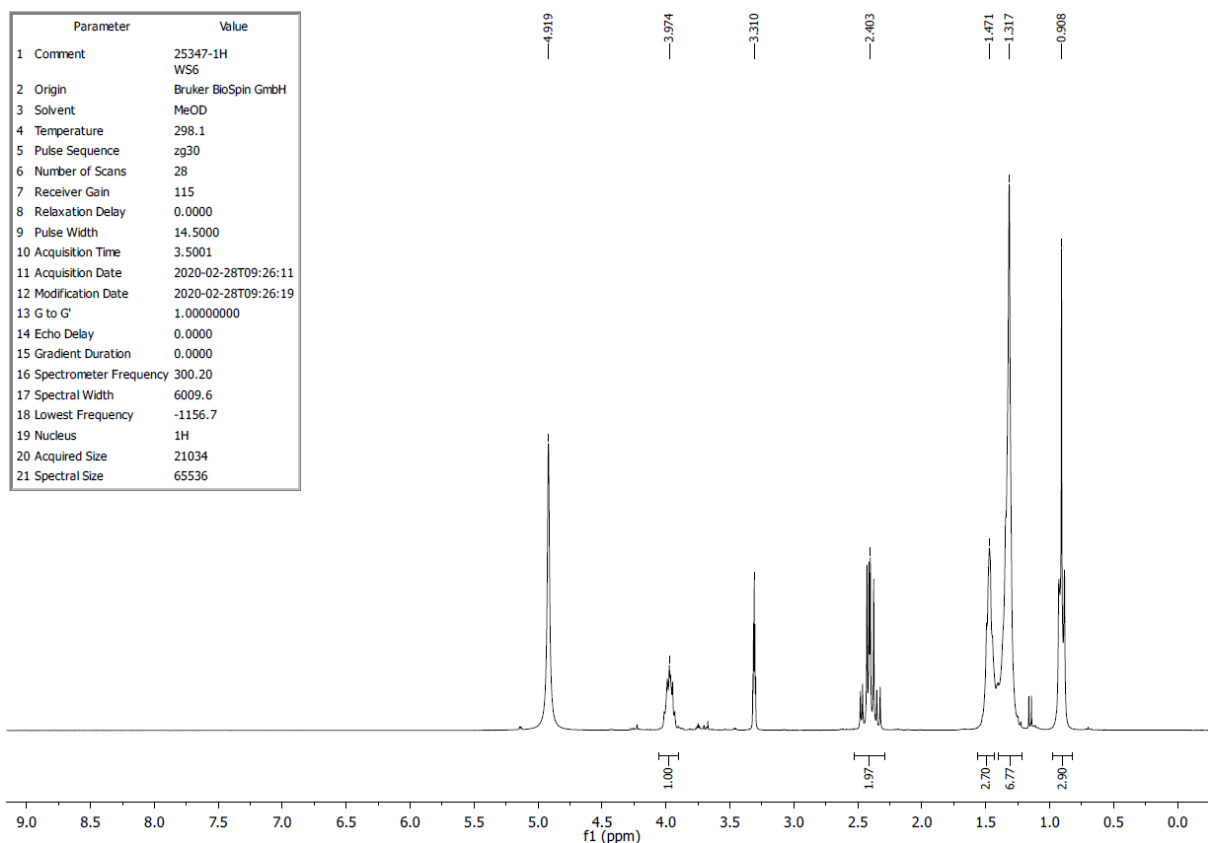

b)  $^1\text{H}$ NMR spectra: (300 MHz, Methanol- $d_4$ )  $\delta$  4.90 (s, 3H), 4.16 (q,  $J = 7.1$  Hz, 1H), 4.07 – 3.91 (m, 1H), 3.33 (p,  $J = 1.6$  Hz, 1H), 2.55 – 2.31 (m, 2H), 1.58 – 1.23 (m, 11H), 1.03 – 0.82 (m, 3H)

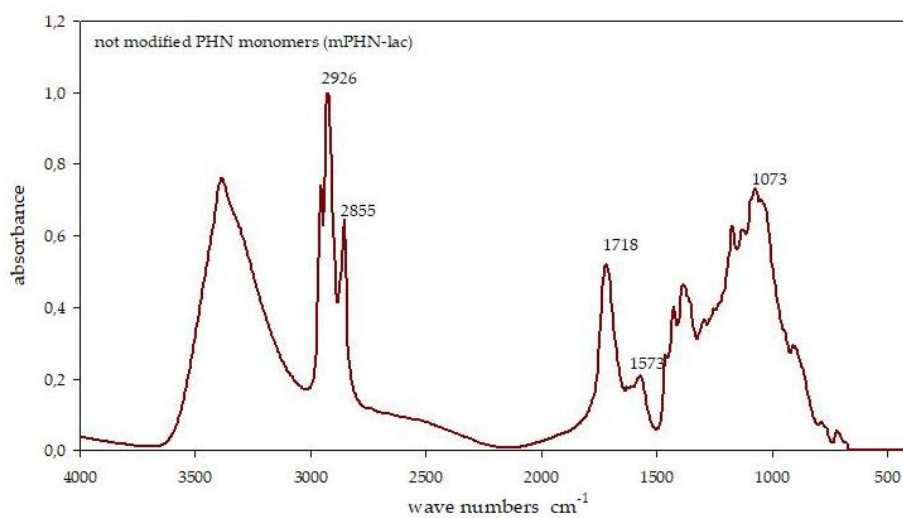

c) IR spectra

**Fig 10.** Spectral analysis of lactose mono and diesters esters originated from mixture of not modified PHN monomers (mPHN-lac)

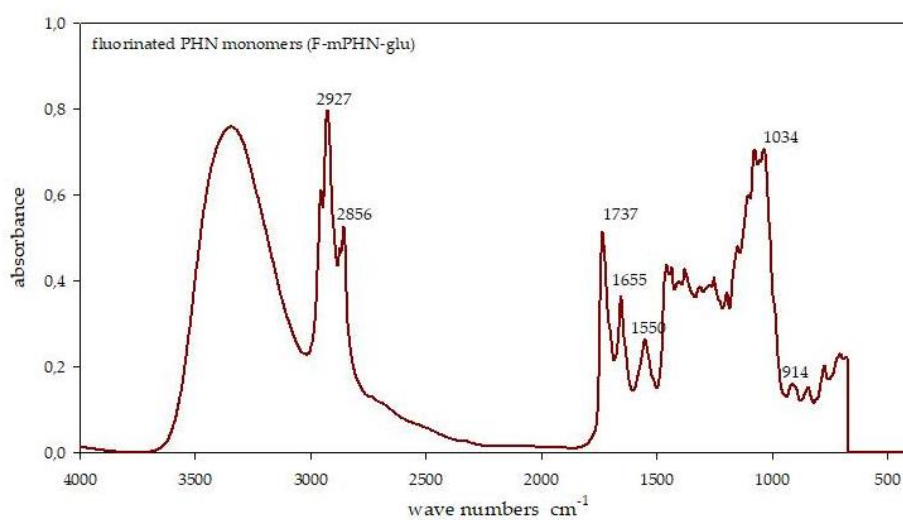

**Fig 11.** IR spectra of glucose mono and diesters esters originated from mixture of fluorinated PHN monomers (F-mPHN-glu)

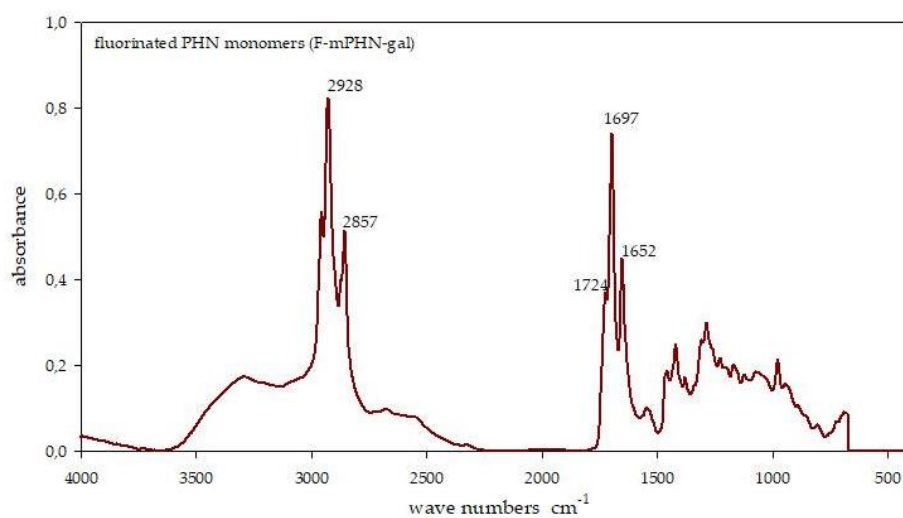

**Fig 12.** IR spectra of galactose mono and diesters esters originated from mixture of fluorinated PHN monomers (F-mPHN-gal)

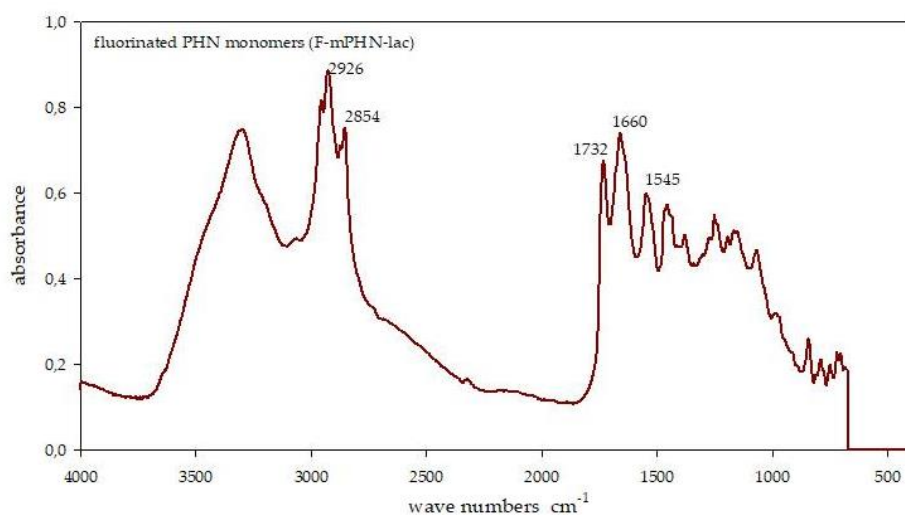

**Fig 13.** IR spectra of lactose mono and diesters esters originated from mixture of fluorinated PHN monomers (F-mPHN-lac)

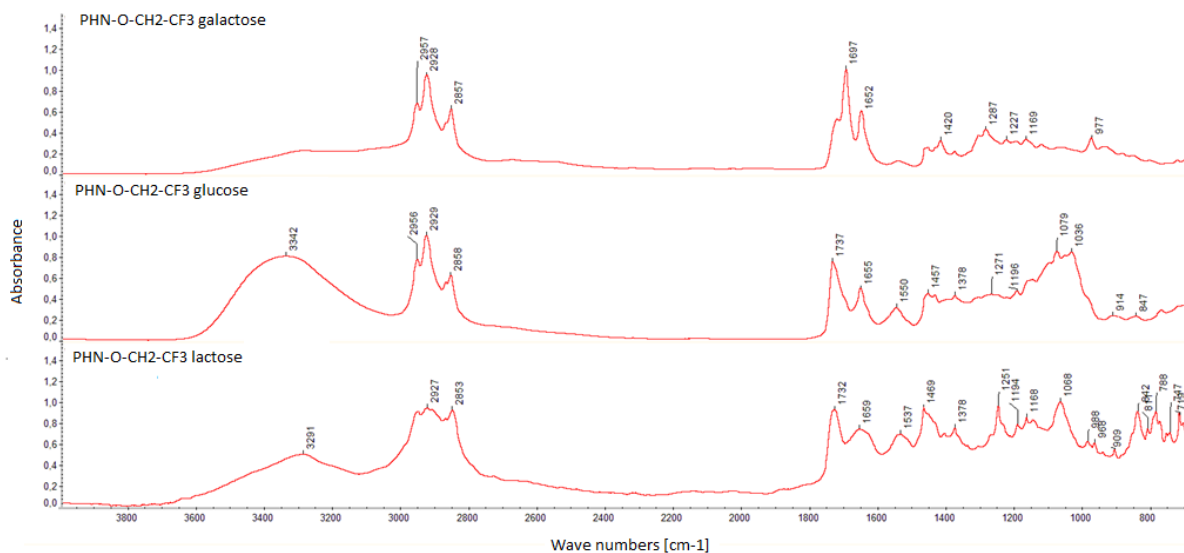

**Fig 14.** IR spectra of fluorinated esters set together



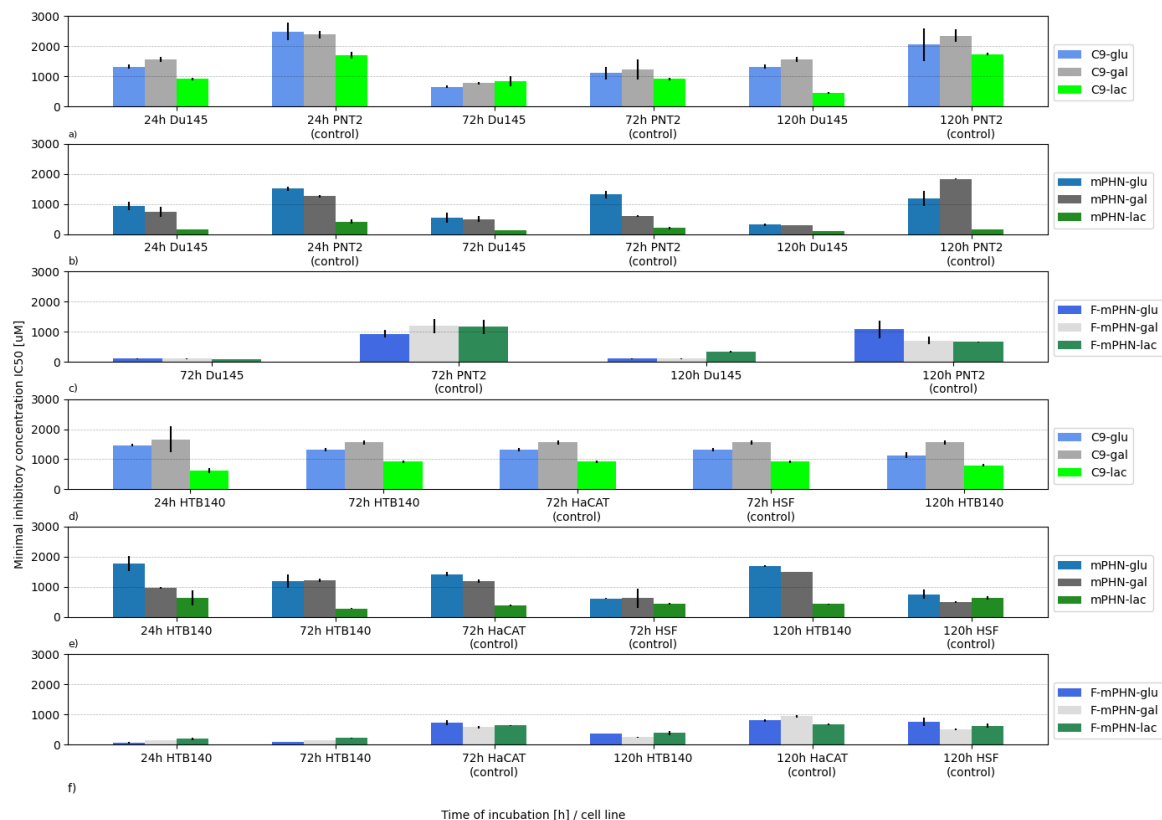

**Fig 15.** Cytotoxicity of SFAE determined by MTT assay, where IC<sub>50</sub> is a concentration [μM] of a particular compound that causes reduction of a tested cell culture to 50% :

- a) nonanoic acid originated SFAE tested on DU145 / PNT2 (control)
- b) mPHN originated SFAE tested on DU145 / PNT2 (control)
- c) F-mPHN originated SFAE tested on DU145 / PNT2 (control)
- d) nonanoic acid originated SFAE tested on HTB40 /HaCat/ HSF (control)
- e) mPHN originated SFAE tested on HTB40 /HaCat/ HSF (control)
- f) F-mPHN originated SFAE tested on HTB40 /HaCat/ HSF (control)

**Table 2.** Cytotoxicity of SFAE determined by MTT assay: – not determined; d – standard deviation. Red fillings mark the most lowest concentrations, green- the highest.

|                                             | Time [h] | C9-glu | C9-gal | C9-lac | PHN-glu | PHN-gal | PHN-lac | F-mPHN-glu | F-mPHN-gal | F-mPHN-lac |
|---------------------------------------------|----------|--------|--------|--------|---------|---------|---------|------------|------------|------------|
| <b>DU145 (prostate cancer)</b>              | 24       | 1317.1 | 1560.5 | 919.5  | 932.1   | 750.9   | 161.2   | -          | -          | -          |
|                                             | d        | 66     | 78     | 46     | 146     | 169     | 3       | -          | -          | -          |
|                                             | 72       | 658.6  | 780.3  | 836.9  | 541.1   | 500.0   | 131.4   | 100.0      | 100.0      | 83.8       |
|                                             | d        | 33     | 39     | 169    | 159     | 100     | 5       | 5          | 5          | 4          |
|                                             | 120      | 1317.1 | 1560.8 | 459.8  | 315.7   | 304.6   | 91.3    | 100.0      | 100.0      | 335.0      |
|                                             | d        | 66     | 78     | 23     | 41      | 2       | 3       | 5          | 5          | 17         |
| <b>PNT2 (control)</b>                       | 24       | 2491.5 | 2390.9 | 1707.2 | 1507.6  | 1256.8  | 421.0   | -          | -          | -          |
|                                             | d        | 285    | 120    | 110    | 80      | 32      | 79      | -          | -          | -          |
|                                             | 72       | 1110.5 | 1233.3 | 919.5  | 1312.2  | 612.5   | 199.5   | 926.8      | 1183.5     | 1156.4     |
|                                             | d        | 207    | 327    | 46     | 115     | 31      | 42      | 127        | 238        | 234        |
|                                             | 120      | 2053.1 | 2355.3 | 1743.7 | 1180.2  | 1838.4  | 165.2   | 1075.5     | 704.9      | 662.5      |
|                                             | d        | 538    | 220    | 33     | 247     | 20      | 5       | 296        | 117        | 8          |
| <b>HTB 140 (melanoma)</b>                   | 24       | 1468.8 | 1659.0 | 621.6  | 1767.6  | 967.3   | 640.0   | 63.3       | 155.9      | 189.0      |
|                                             | d        | 46     | 434    | 77     | 253     | 26      | 250     | 24         | 3          | 49         |
|                                             | 72       | 1317.1 | 1560.5 | 919.5  | 1195.7  | 1224.9  | 283.4   | 89.3       | 155.9      | 216.9      |
|                                             | d        | 66     | 78     | 46     | 232     | 61      | 8       | 2          | 3          | 21         |
|                                             | 120      | 1133.9 | 1560.5 | 805.3  | 1689.4  | 1496.4  | 435.0   | 372.4      | 247.9      | 394.2      |
|                                             | d        | 92     | 78     | 51     | 35      | 2       | 10      | 3          | 11         | 70         |
| <b>HaCAT (human keratinocytes-control)</b>  | 72       | 1317.1 | 1560.5 | 919.5  | 1427.3  | 1200.0  | 383.9   | 733.7      | 580.0      | 644.1      |
|                                             | d        | 66     | 78     | 46     | 71      | 60      | 25      | 81         | 37         | 17         |
|                                             | 120      | -      | -      | -      | -       | -       | -       | 800.8      | 945.9      | 670.0      |
|                                             | d        | -      | -      | -      | -       | -       | -       | 40         | 47         | 33         |
| <b>HSF (human skin fibroblasts-control)</b> | 72       | 1317.1 | 1560.5 | 919.5  | 613.4   | 624.2   | 445.8   | -          | -          | -          |
|                                             | d        | 66     | 78     | 46     | 12      | 322     | 24      | -          | -          | -          |
|                                             | 120      | -      | -      | -      | 761.2   | 499.6   | 631.1   | 761.2      | 499.6      | 631.1      |
|                                             | d        | -      | -      | -      | 143     | 25      | 64      | 143        | 25         | 64         |
